# Supplementary material for: Influence of psychostimulants and opioids on epigenetic modification of class III histone deacetylase (HDAC)-sirtuins in glial cells
Source: PubMed Central journal article supplement (PMC8556237; doi:10.1038/s41598-021-00836-z), 2021-10-29
Supplement: 41598_2021_836_MOESM1_ESM.pdf [file 41598_2021_836_MOESM1_ESM.pdf]

**Figure 1**

**A**

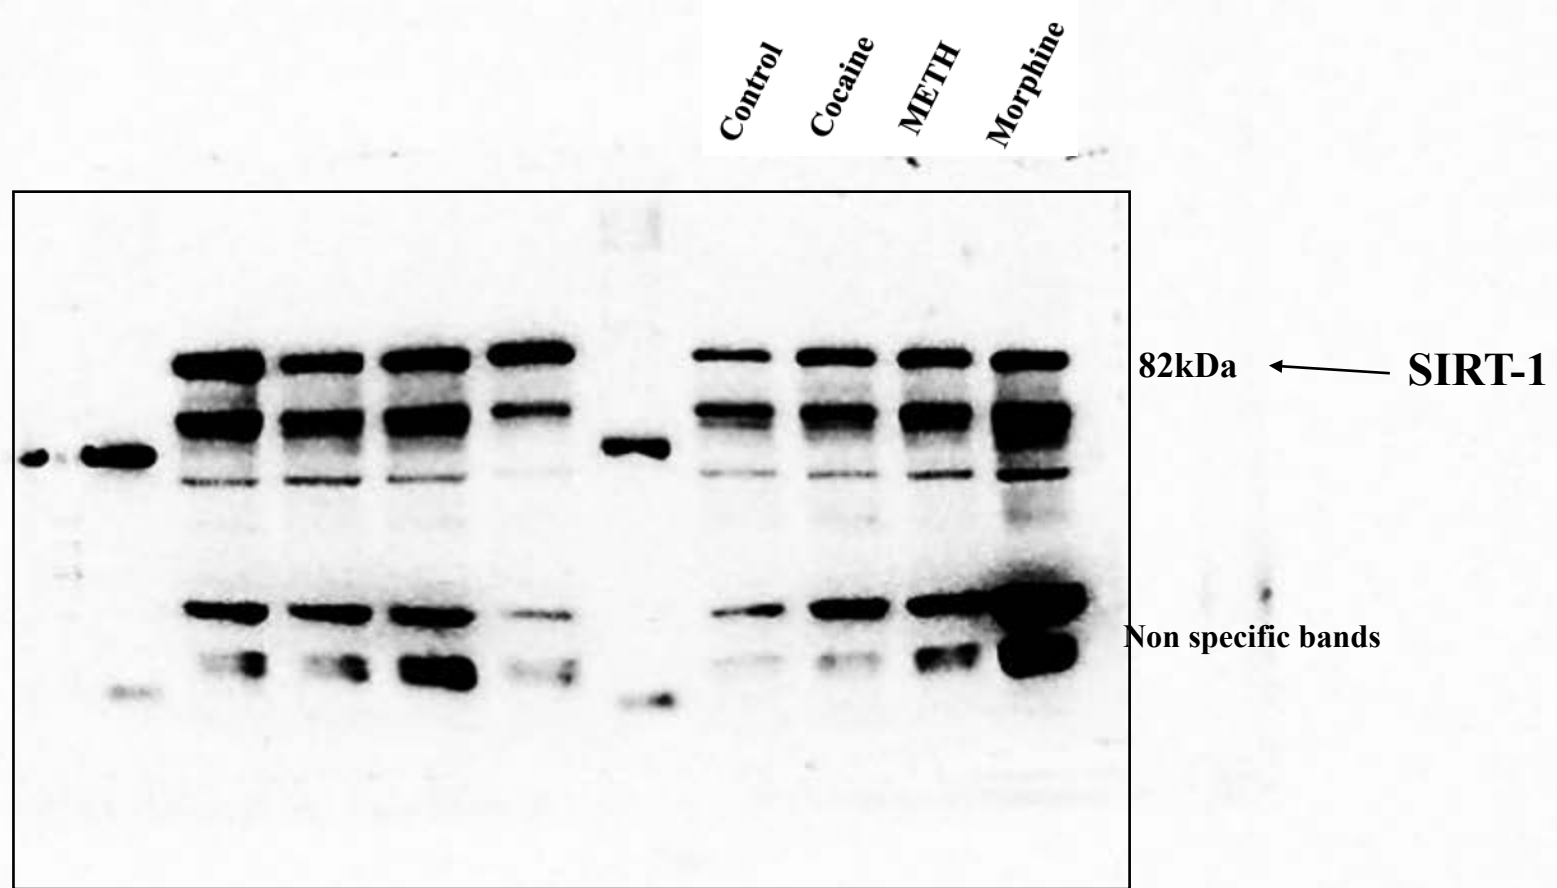

**Figure 1 A: Effects of psychostimulants and opioids on SIRT-1 in human primary astrocytes. The representative blot shows SIRT-1 protein level in control, cocaine (1  $\mu$ M), METH (10  $\mu$ M) and morphine (5  $\mu$ M).**

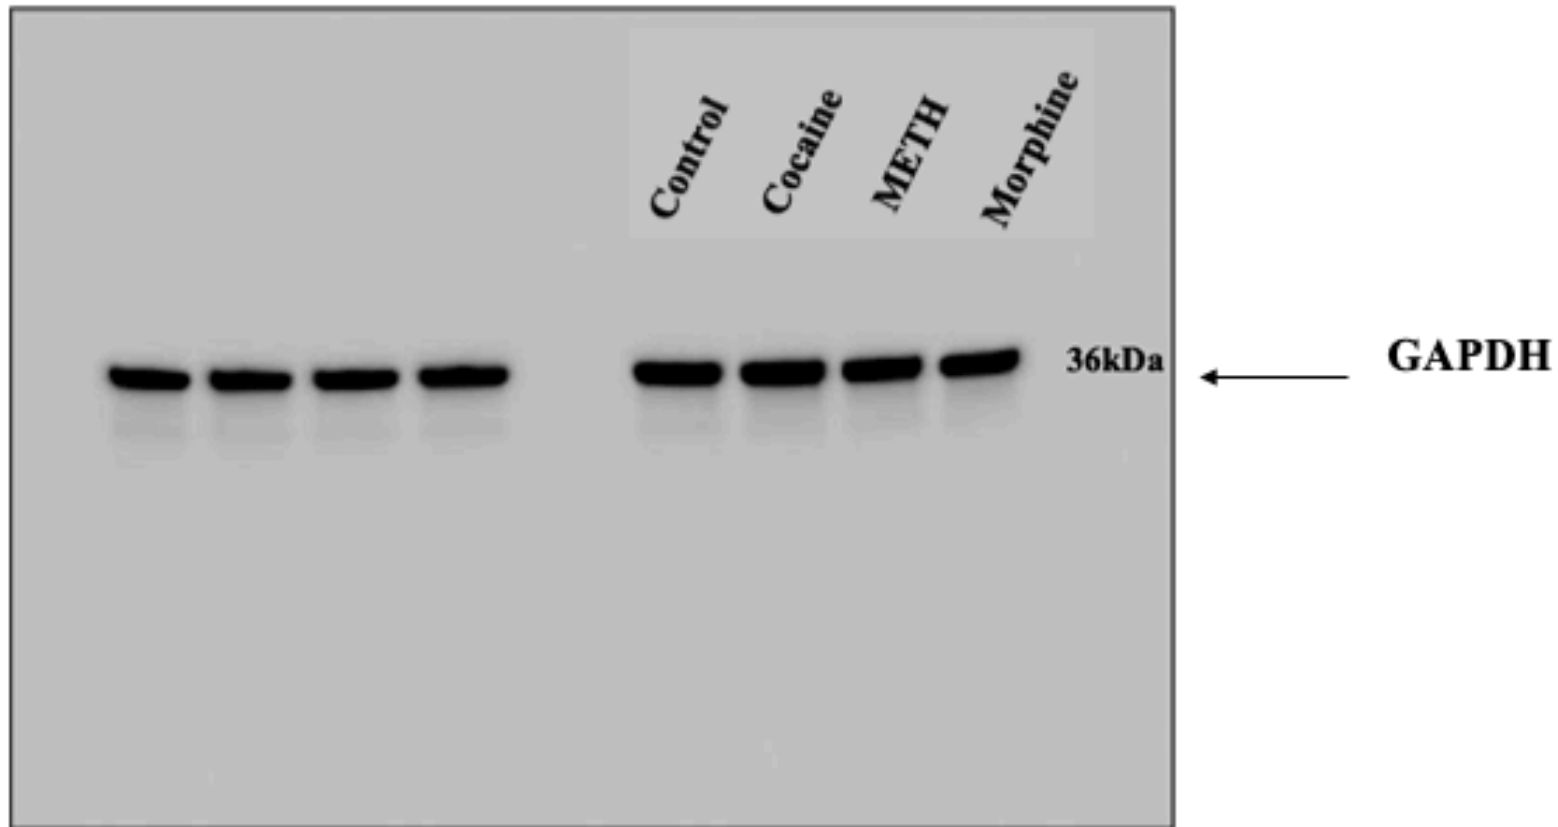

**Figure 1 A: GAPDH for SIRT-1 in human primary astrocytes.**  
The representative blot shows GAPDH for SIRT-1 in control, cocaine (1  $\mu$ M), METH (10  $\mu$ M) and morphine (5  $\mu$ M).

Figure 1

B

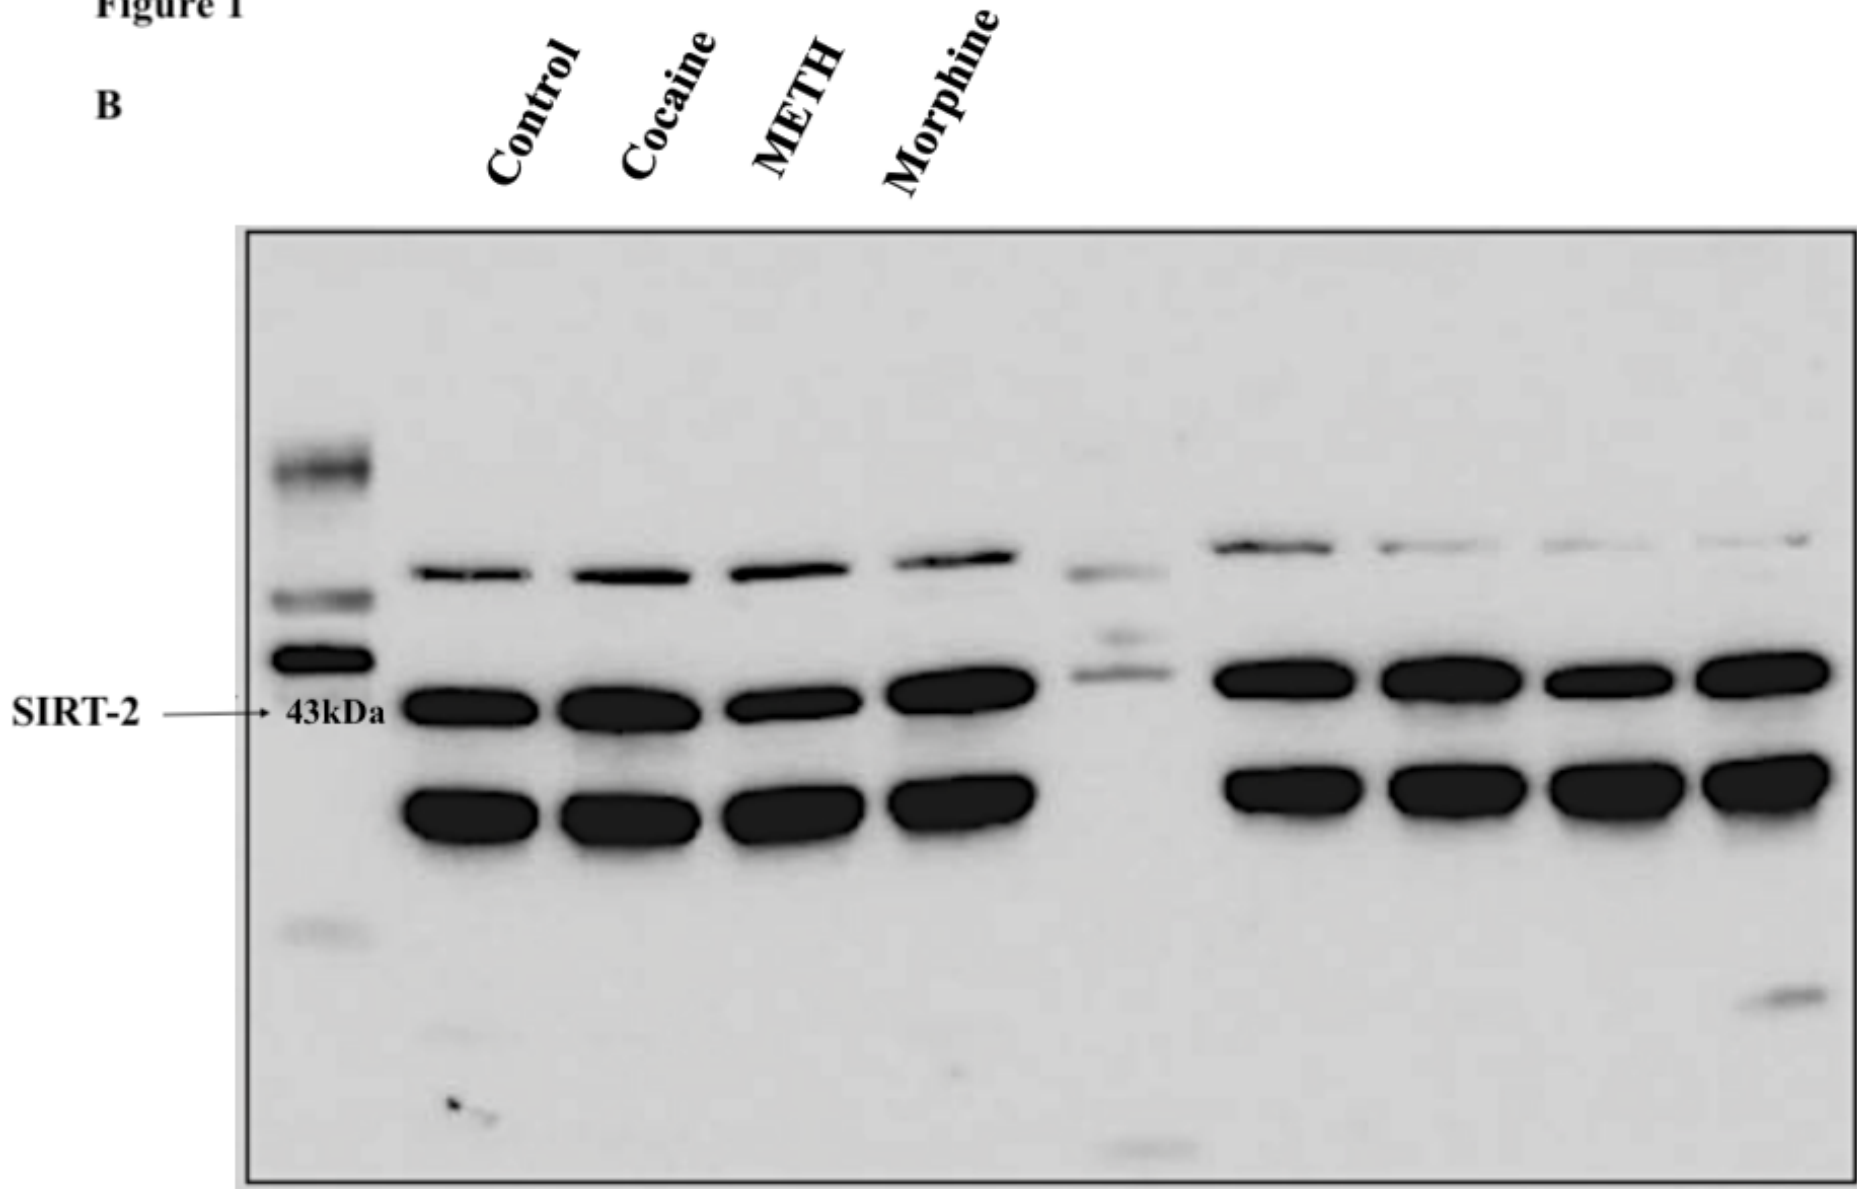

**Figure 1 B: Effects of psychostimulants and opioids on SIRT-2 in human primary astrocytes. The representative blot shows SIRT-2 protein level in control, cocaine (1  $\mu$ M), METH (10  $\mu$ M) and morphine (5  $\mu$ M).**

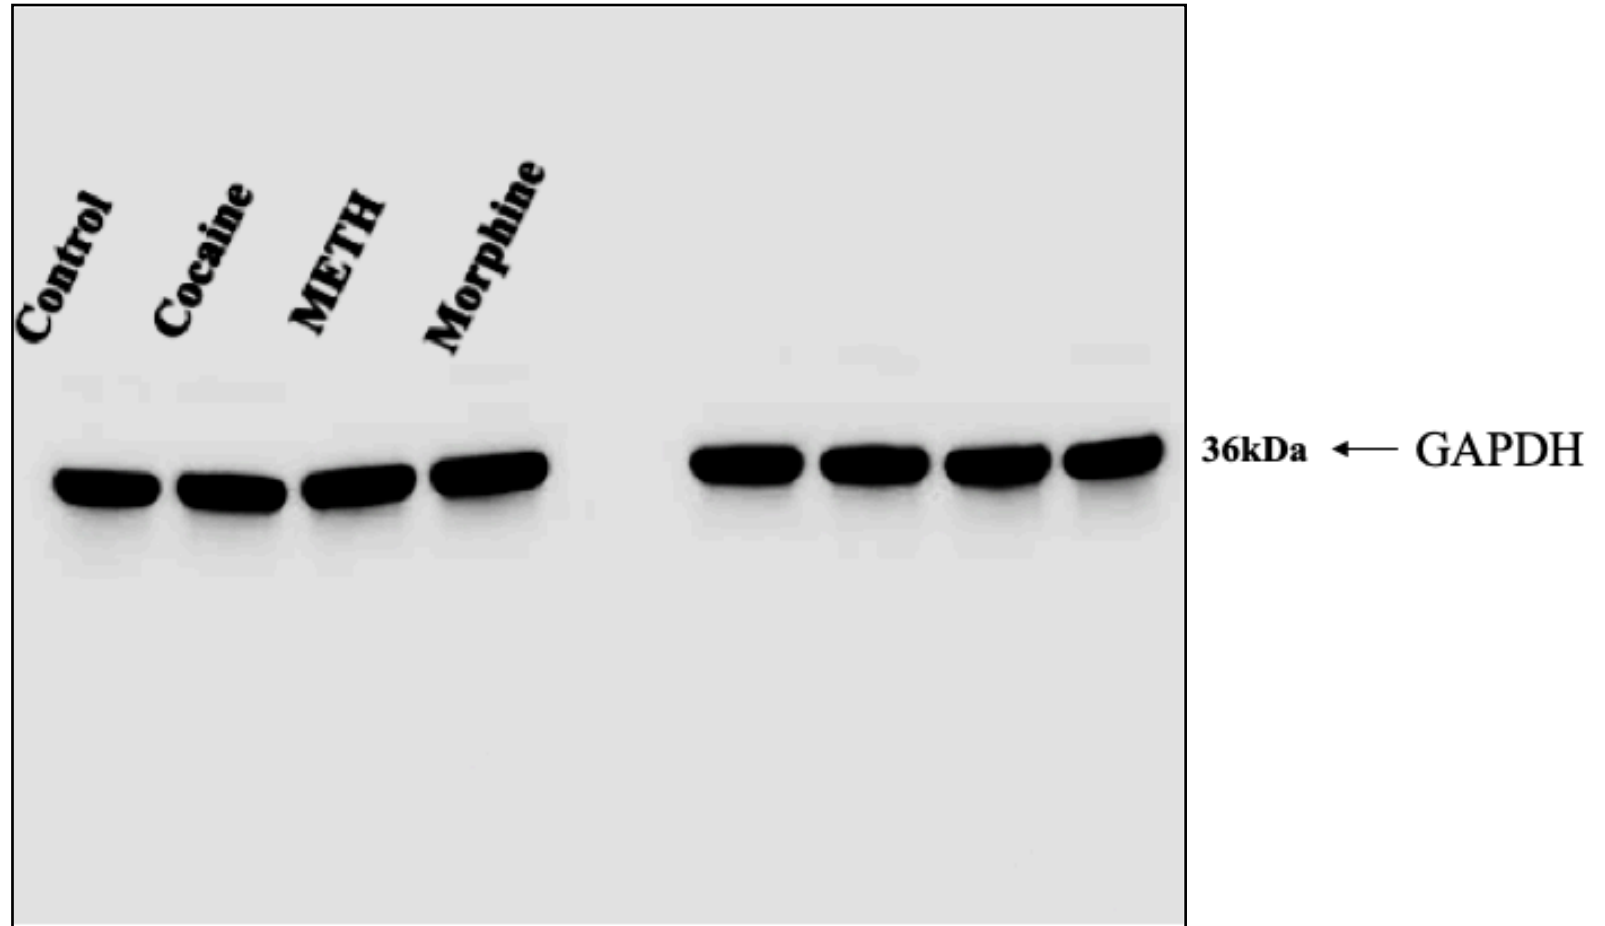

**Figure 1 B: GAPDH for SIRT-2 in human primary astrocytes.**  
The representative blot shows GAPDH for SIRT-2 in control, cocaine (1  $\mu\text{M}$ ), METH (10  $\mu\text{M}$ ) and morphine (5  $\mu\text{M}$ ).

## Figure 1

C

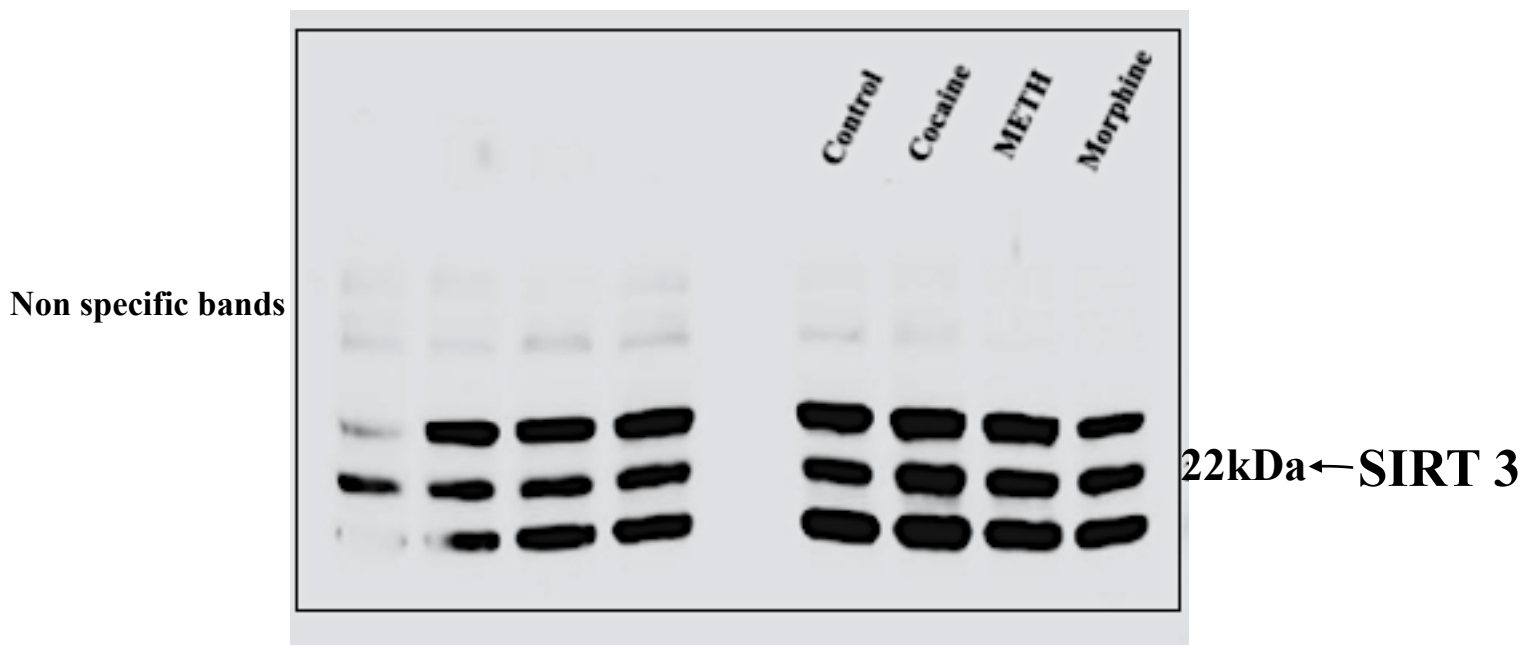

**Figure 1 C: Effects of psychostimulants and opioids on SIRT-3 in human primary astrocytes.**

**The representative blot shows SIRT-3 protein level in control, cocaine (1  $\mu$ M), METH (10  $\mu$ M) and morphine (5  $\mu$ M).**

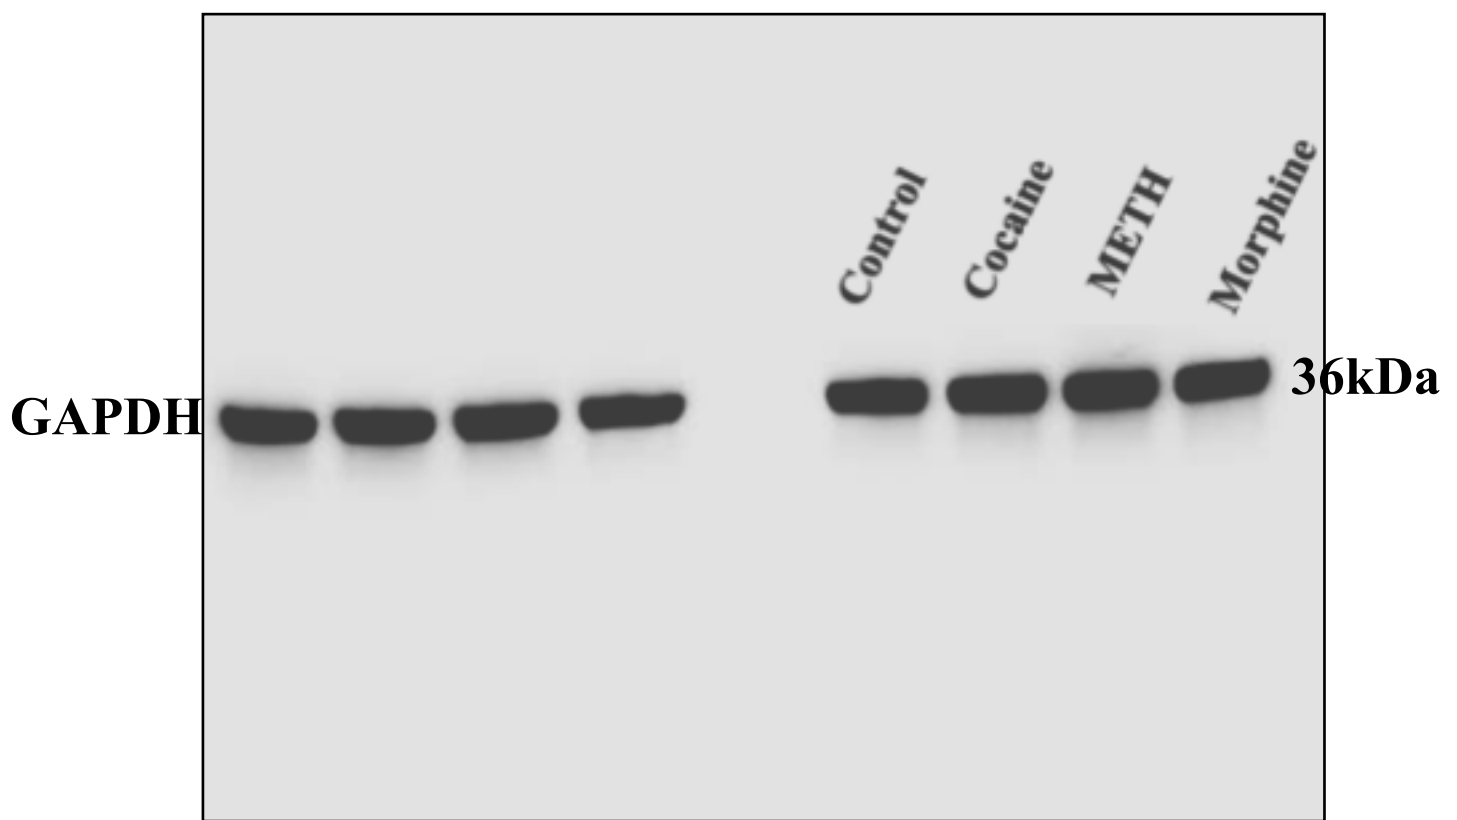

**Figure 1 C: GAPDH for SIRT-3 in human primary astrocytes.**  
The representative blot shows GAPDH for SIRT-3 in control, cocaine (1  $\mu$ M), METH (10  $\mu$ M) and morphine (5  $\mu$ M).

**Figure 1**

**G**

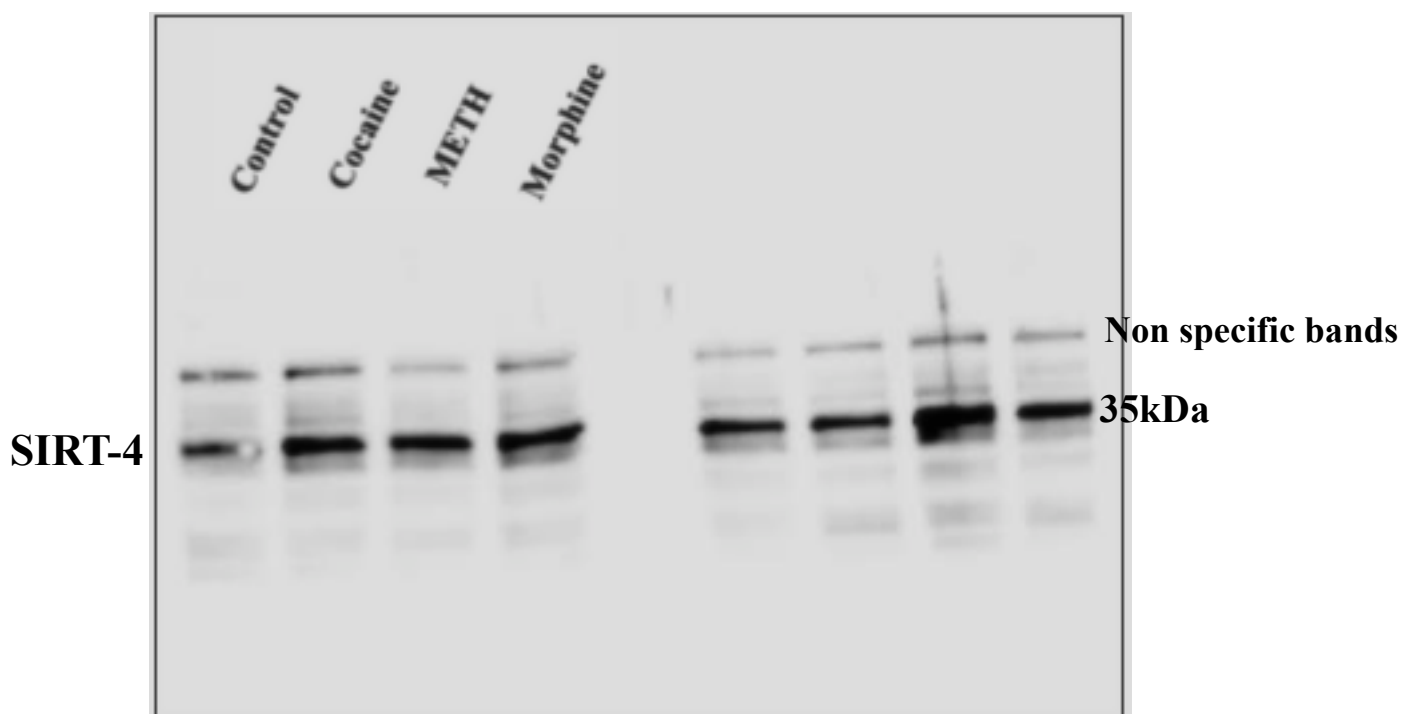

**Figure 1 G: Effects of psychostimulants and opioids on SIRT-4 in human primary astrocytes.**

**The representative blot shows SIRT-4 protein level in control, cocaine (1  $\mu$ M), METH (10  $\mu$ M) and morphine (5  $\mu$ M).**

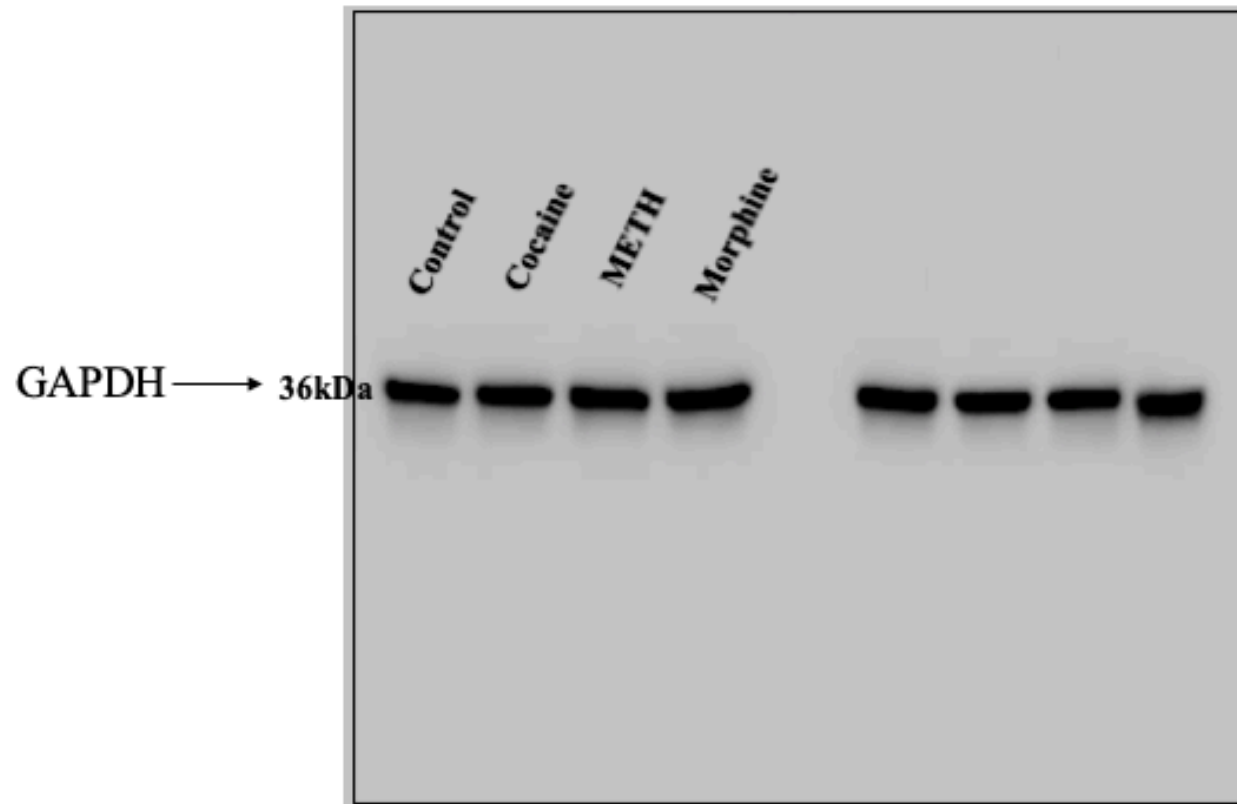

**Figure 1 G: GAPDH for SIRT-4 in human primary astrocytes.**  
The representative blot shows GAPDH for SIRT-4 in control, cocaine (1  $\mu$ M), METH (10  $\mu$ M) and morphine (5  $\mu$ M).



**Figure 1**

**H**

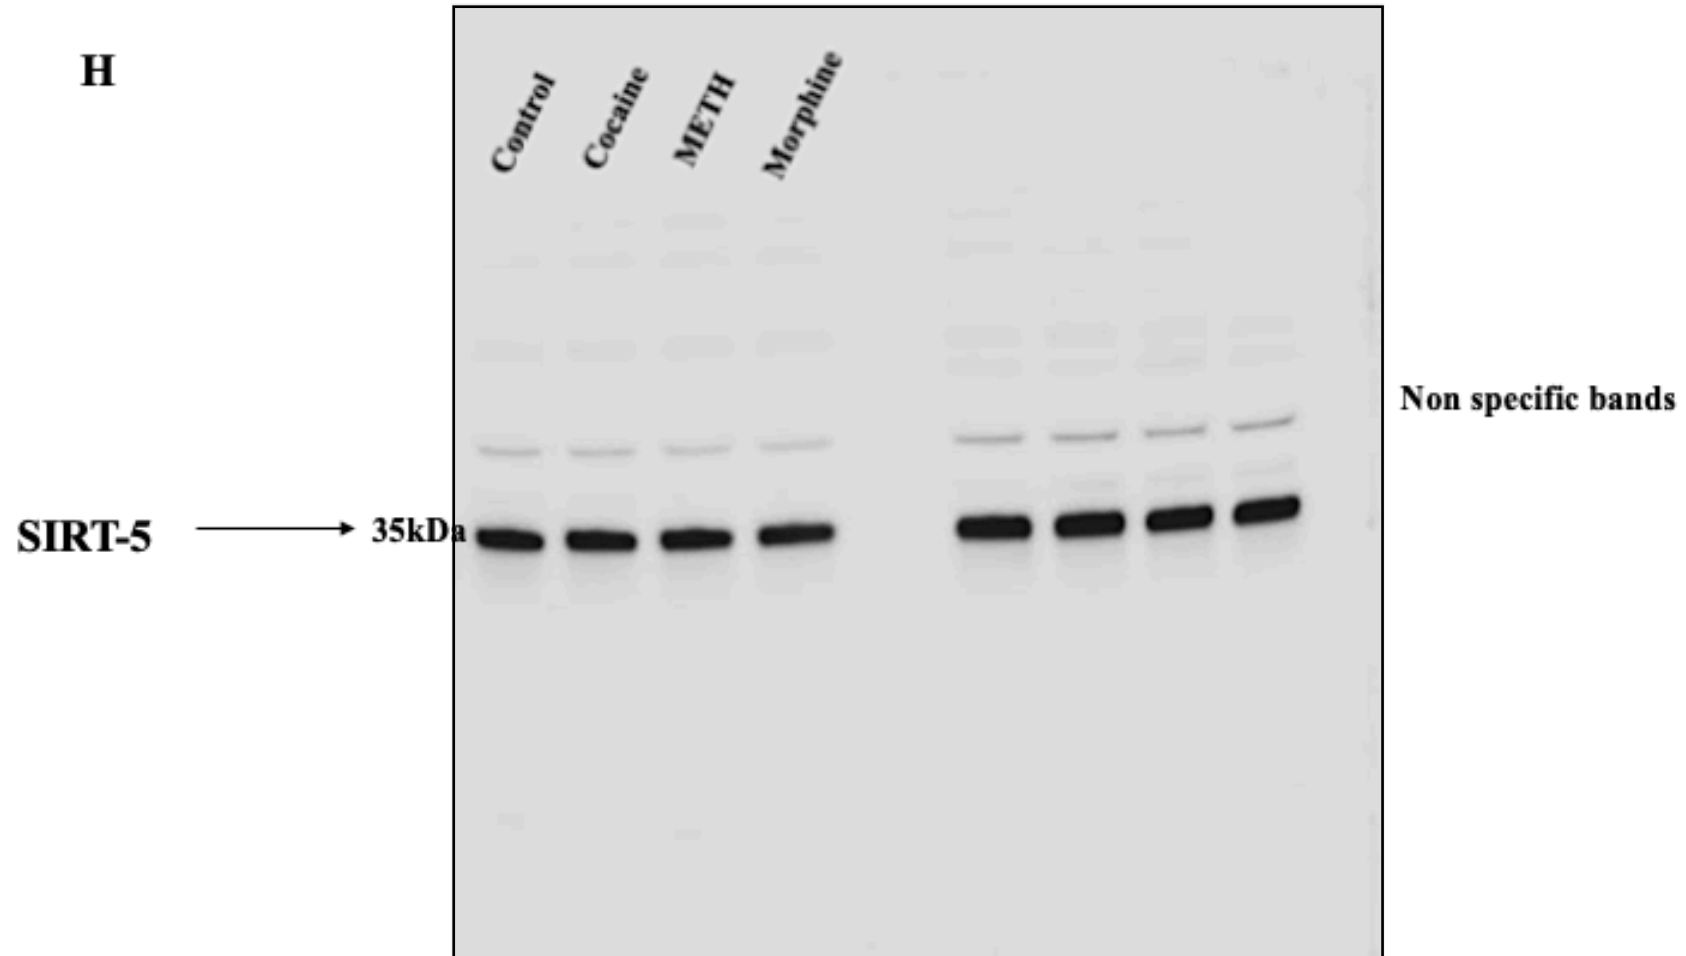

**Figure 1 H: Effects of psychostimulants and opioids on SIRT-5 in human primary astrocytes. The representative blot shows SIRT-5 protein level in control, cocaine (1  $\mu$ M), METH (10  $\mu$ M) and morphine (5  $\mu$ M).**

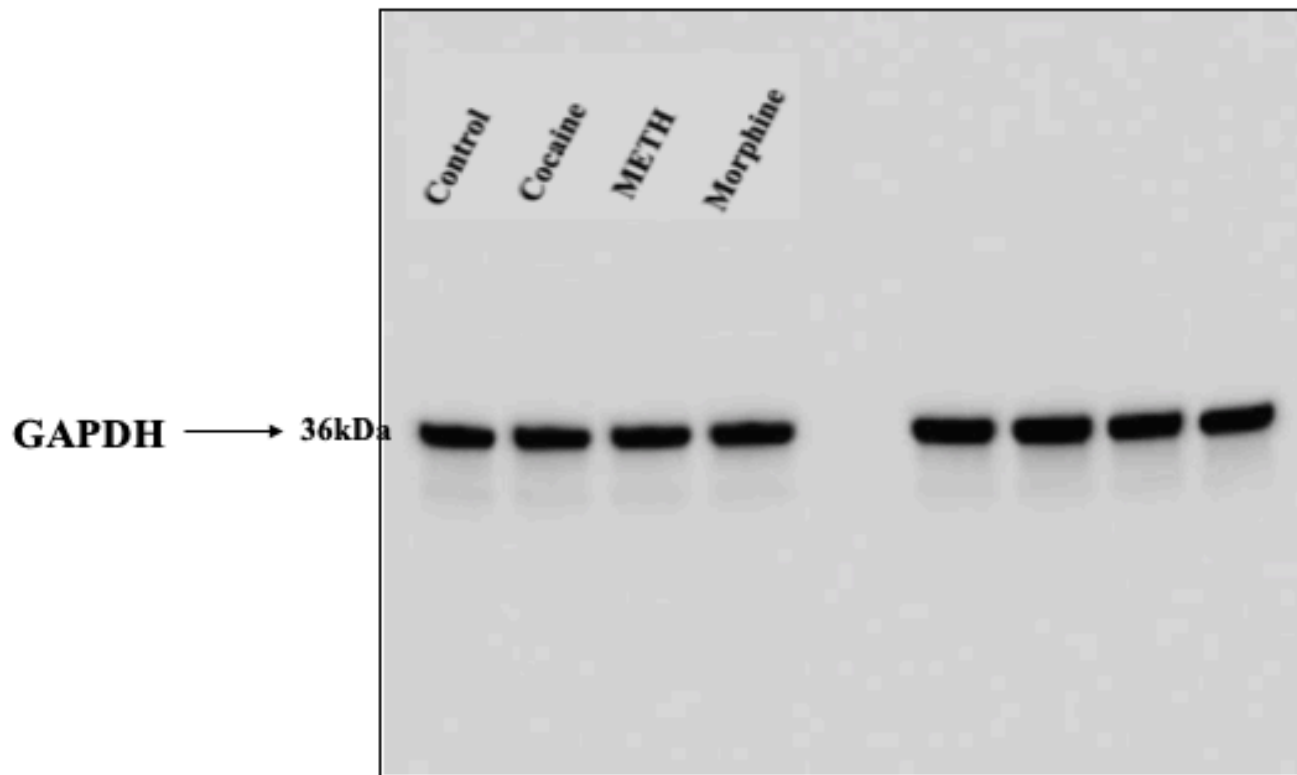

**Figure 1 H: GAPDH for SIRT-5 in human primary astrocytes. The representative blot shows GAPDH for SIRT-5 in control, cocaine (1  $\mu$ M), METH (10  $\mu$ M) and morphine (5  $\mu$ M).**

**Figure 1**

**K**

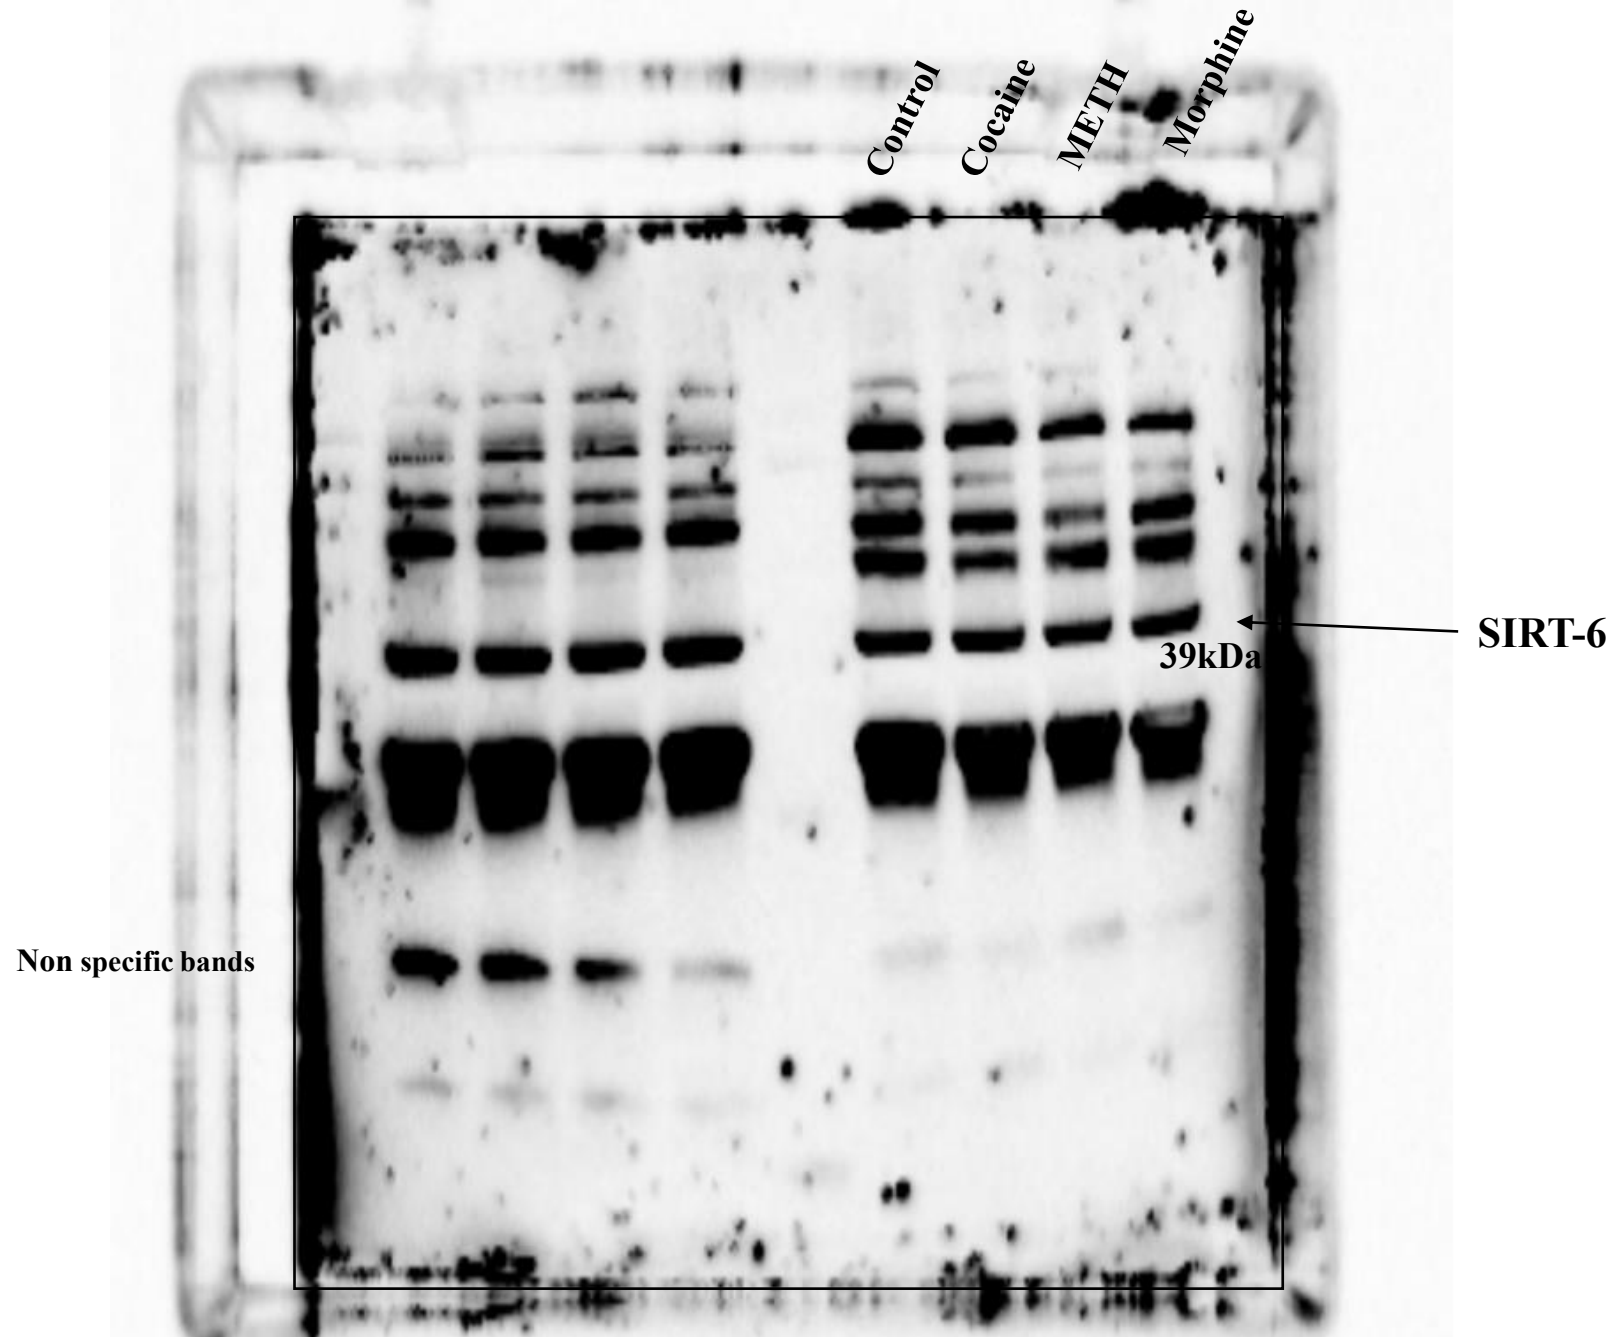

**Figure 1 K: Effects of psychostimulants and opioids on SIRT-6 in human primary astrocytes. The representative blot shows SIRT-6 protein level in control, cocaine (1  $\mu$ M), METH (10  $\mu$ M) and morphine (5  $\mu$ M).**

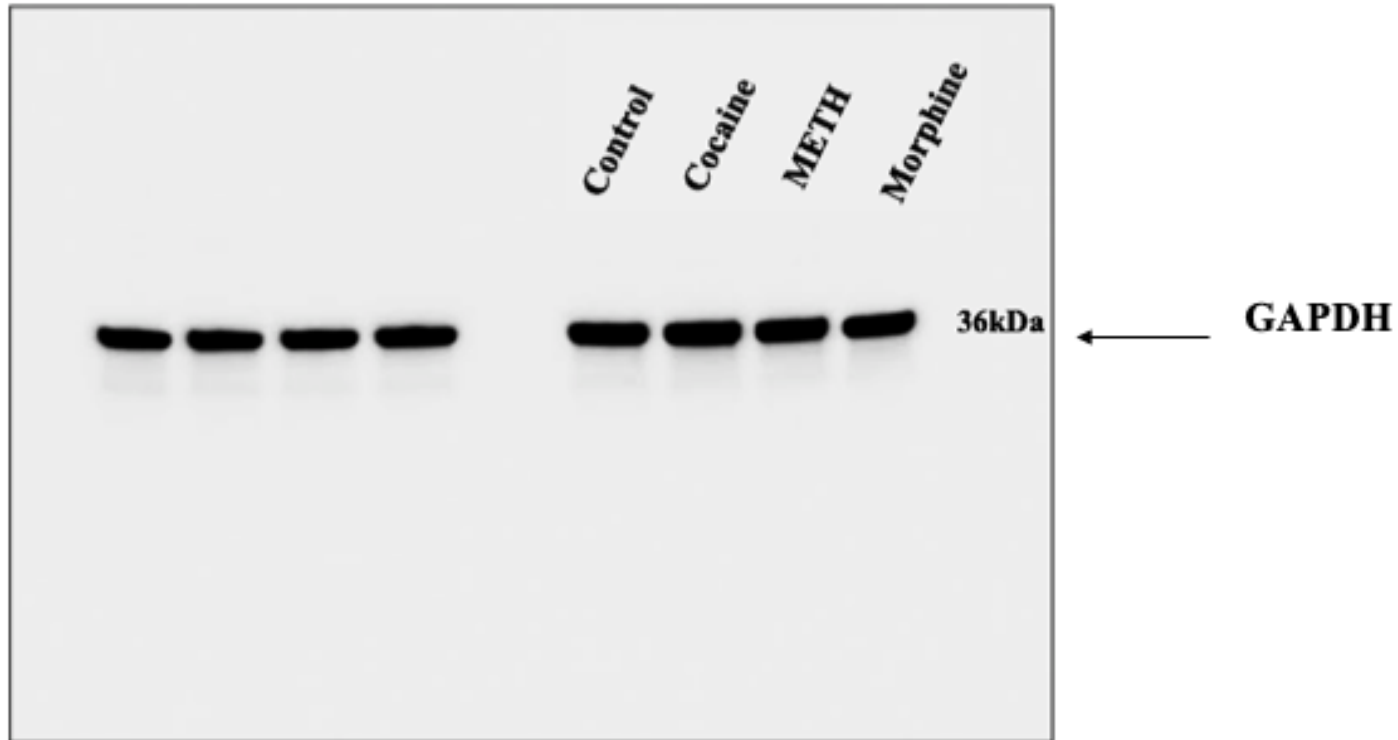

**Figure 1 K: GAPDH for SIRT-6 in human primary astrocytes.**  
The representative blot shows GAPDH for SIRT-6 in control, cocaine (1  $\mu$ M), METH (10  $\mu$ M) and morphine (5  $\mu$ M).

**Figure 1**

**L**

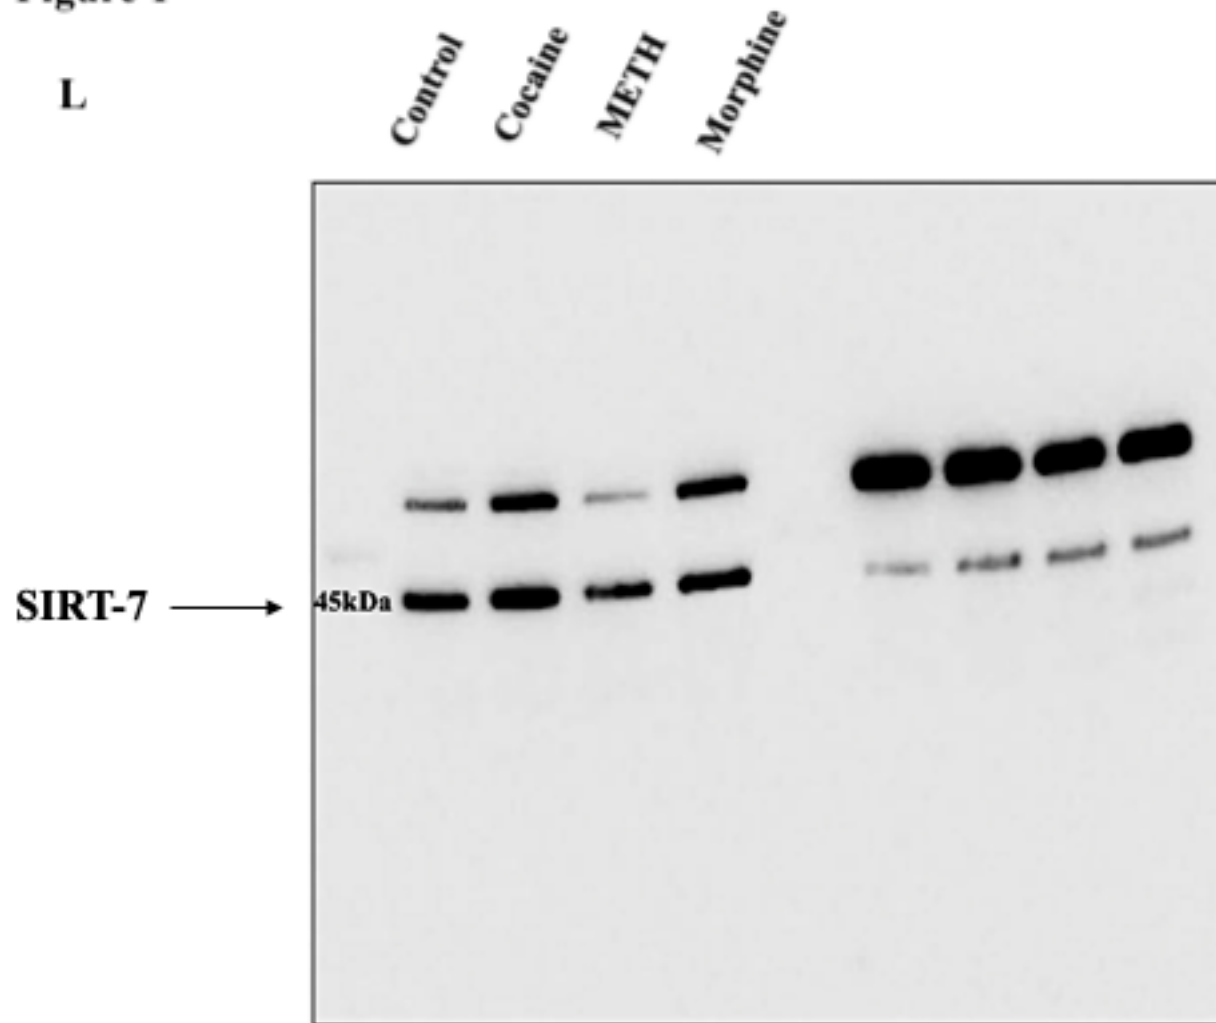

**Figure 1 L: Effects of psychostimulants and opioids on SIRT-7 in human primary astrocytes. The representative blot shows SIRT-7 protein level in control, cocaine (1  $\mu$ M), METH (10  $\mu$ M) and morphine (5  $\mu$ M).**

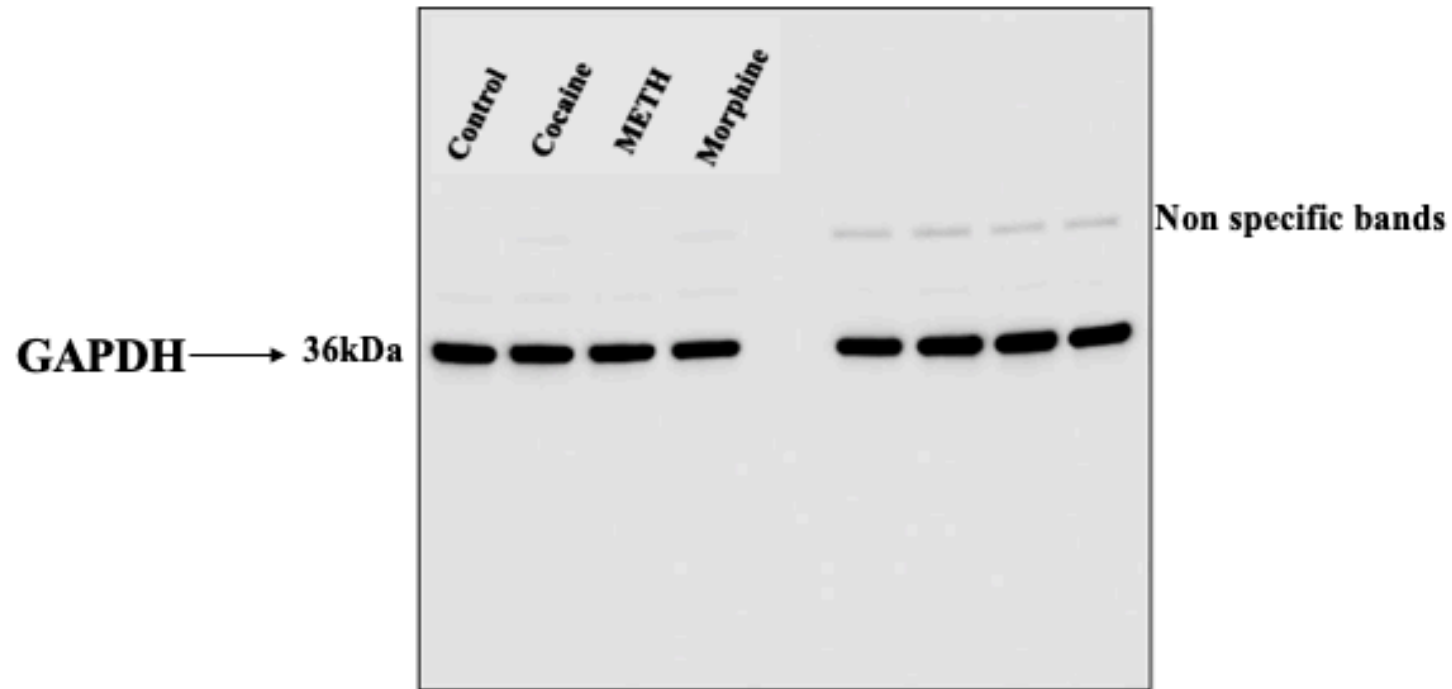

**Figure 1 L: GAPDH for SIRT-7 in human primary astrocytes. The representative blot shows GAPDH for SIRT-7 in control, cocaine (1  $\mu$ M), METH (10  $\mu$ M) and morphine (5  $\mu$ M).**
