# Supplementary material for: Influence of psychostimulants and opioids on epigenetic modification of class III histone deacetylase (HDAC)-sirtuins in glial cells
Source: PubMed Central journal article supplement (PMC8556237; doi:10.1038/s41598-021-00836-z), 2021-10-29
Supplement: 41598_2021_836_MOESM4_ESM.pdf [file 41598_2021_836_MOESM4_ESM.pdf]

Figure 5

A

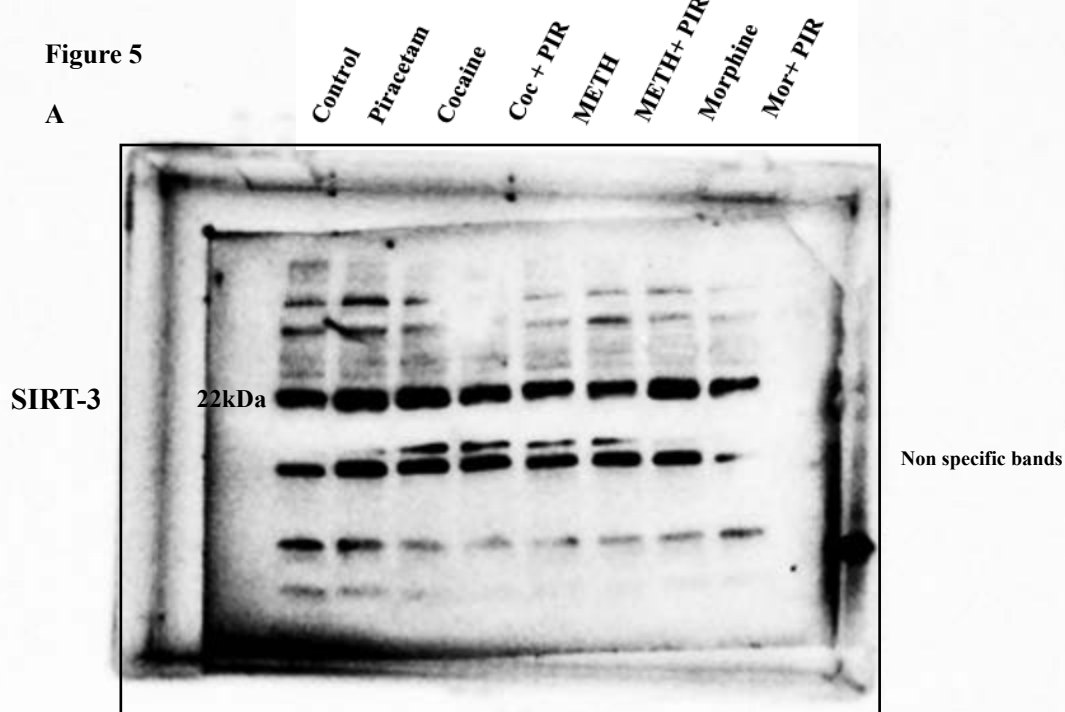

**Figure 5 A: Protective Effect of piracetam against psychostimulants and opioids on SIRT-3 in human primary astrocytes.**

The representative blot shows SIRT-3 protein level in control, cocaine (1  $\mu$ M), METH (10  $\mu$ M) and morphine (5  $\mu$ M) alone or in combination with piracetam (10  $\mu$ M)

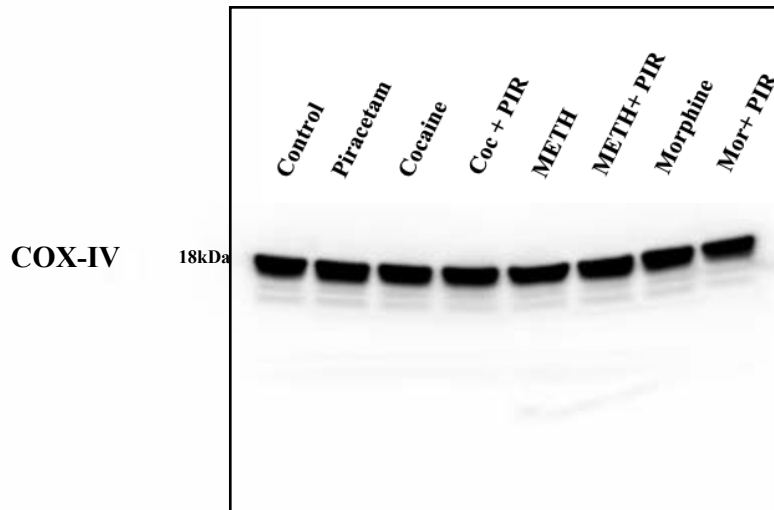

**Figure 5 A: COX-IV for SIRT-3 in human primary astrocytes.**  
The representative blot shows COX-IV for SIRT-3 in control, cocaine (1  $\mu$ M), METH (10  $\mu$ M) and morphine (5  $\mu$ M) alone or in combination with piracetam (10  $\mu$ M)

**Figure 5**

**C**

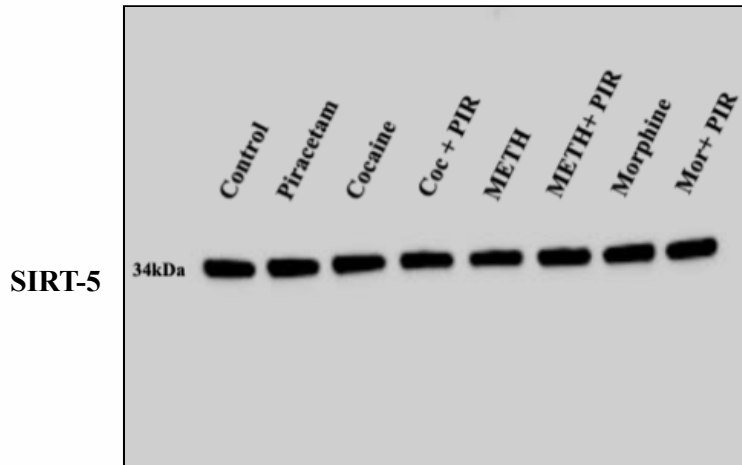

**Figure 5 C: Protective Effect of piracetam against psychostimulants and opioids on SIRT-5 in human primary astrocytes.**  
The representative blot shows SIRT-5 protein level in control, cocaine (1  $\mu$ M), METH (10  $\mu$ M) and morphine (5  $\mu$ M) alone or in combination with piracetam (10  $\mu$ M)

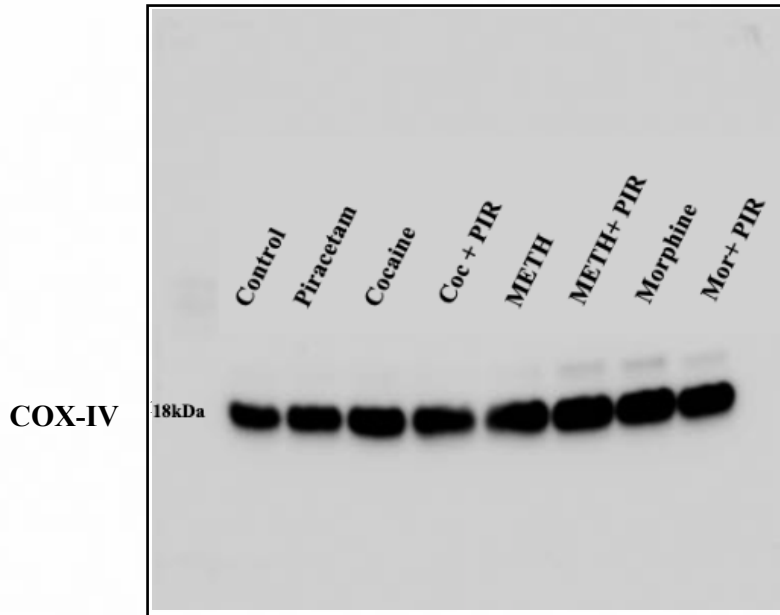

**Figure 5 C: COX-IV for SIRT-5 in human primary astrocytes.**  
The representative blot shows COX-IV for SIRT-5 in control, cocaine (1  $\mu$ M), METH (10  $\mu$ M) and morphine (5  $\mu$ M) alone or in combination with piracetam (10  $\mu$ M)
