# Supplementary material for: Influence of psychostimulants and opioids on epigenetic modification of class III histone deacetylase (HDAC)-sirtuins in glial cells
Source: PubMed Central journal article supplement (PMC8556237; doi:10.1038/s41598-021-00836-z), 2021-10-29
Supplement: 41598_2021_836_MOESM5_ESM.pdf [file 41598_2021_836_MOESM5_ESM.pdf]

Figure 6

A

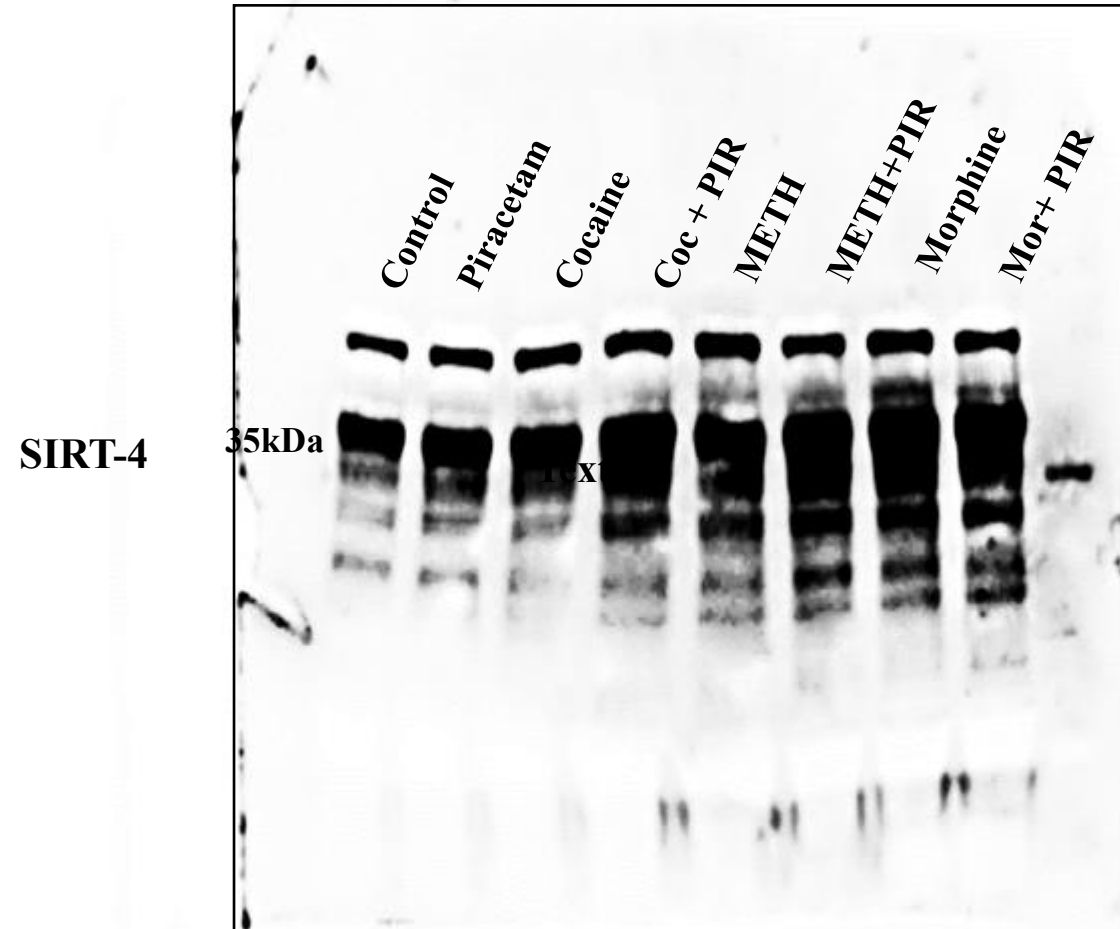

**Figure 6 A: Protective Effect of piracetam against psychostimulants and opioids on SIRT-4 in human primary astrocytes.**

**The representative blot shows SIRT-4 protein level in control, cocaine (1  $\mu$ M), METH (10  $\mu$ M) and morphine (5  $\mu$ M) alone or in combination with piracetam (10  $\mu$ M)**

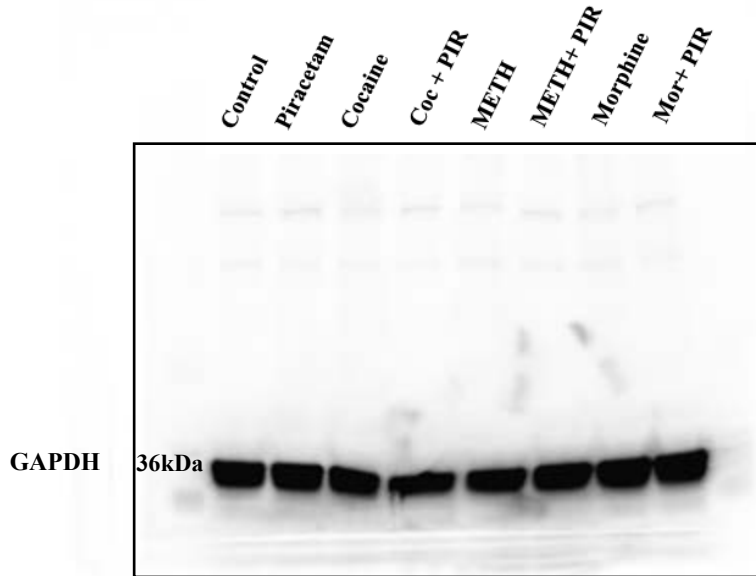

**Figure 6 A: GAPDH for SIRT-4 in human primary astrocytes.**  
The representative blot shows GAPDH for SIRT-4 in control, cocaine (1  $\mu$ M), METH (10  $\mu$ M) and morphine (5  $\mu$ M) alone or in combination with piracetam (10  $\mu$ M)

**Figure 6**

**B**

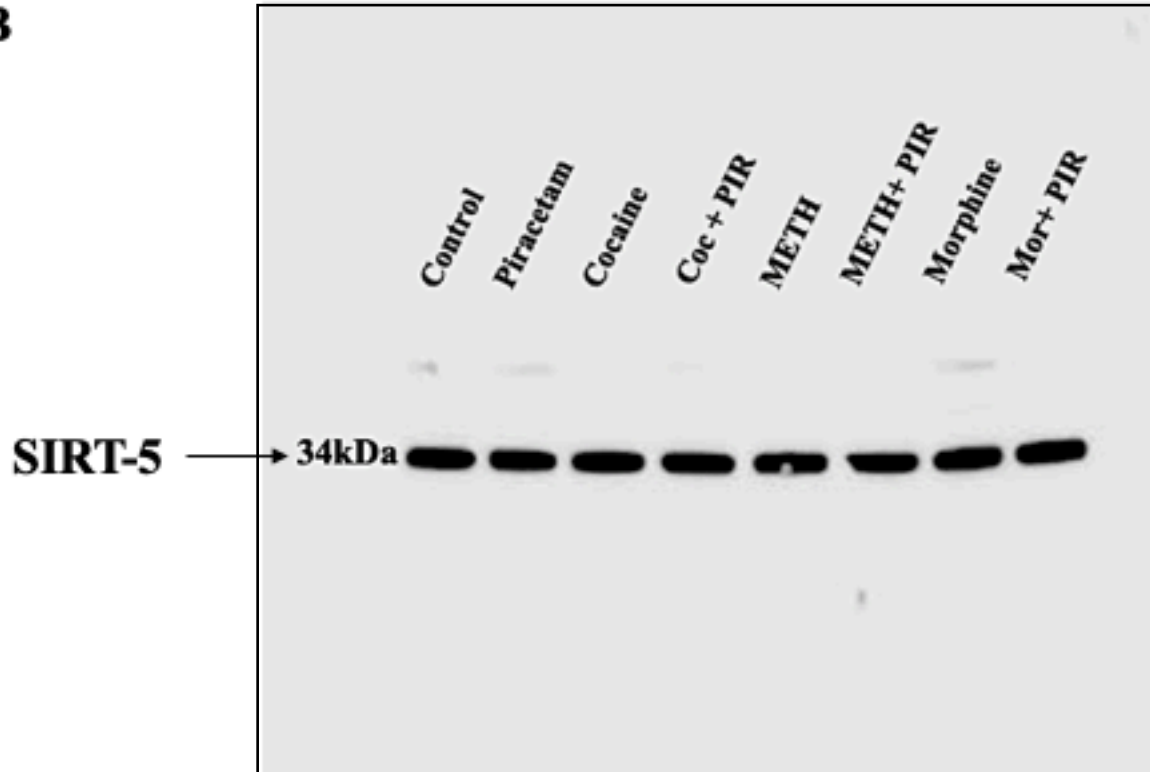

**Figure 6 B: Protective Effect of piracetam against psychostimulants and opioids on SIRT-5 in human primary astrocytes.**

The representative blot shows SIRT-5 protein level in control, cocaine (1  $\mu$ M), METH (10  $\mu$ M) and morphine (5  $\mu$ M) alone or in combination with piracetam (10  $\mu$ M)

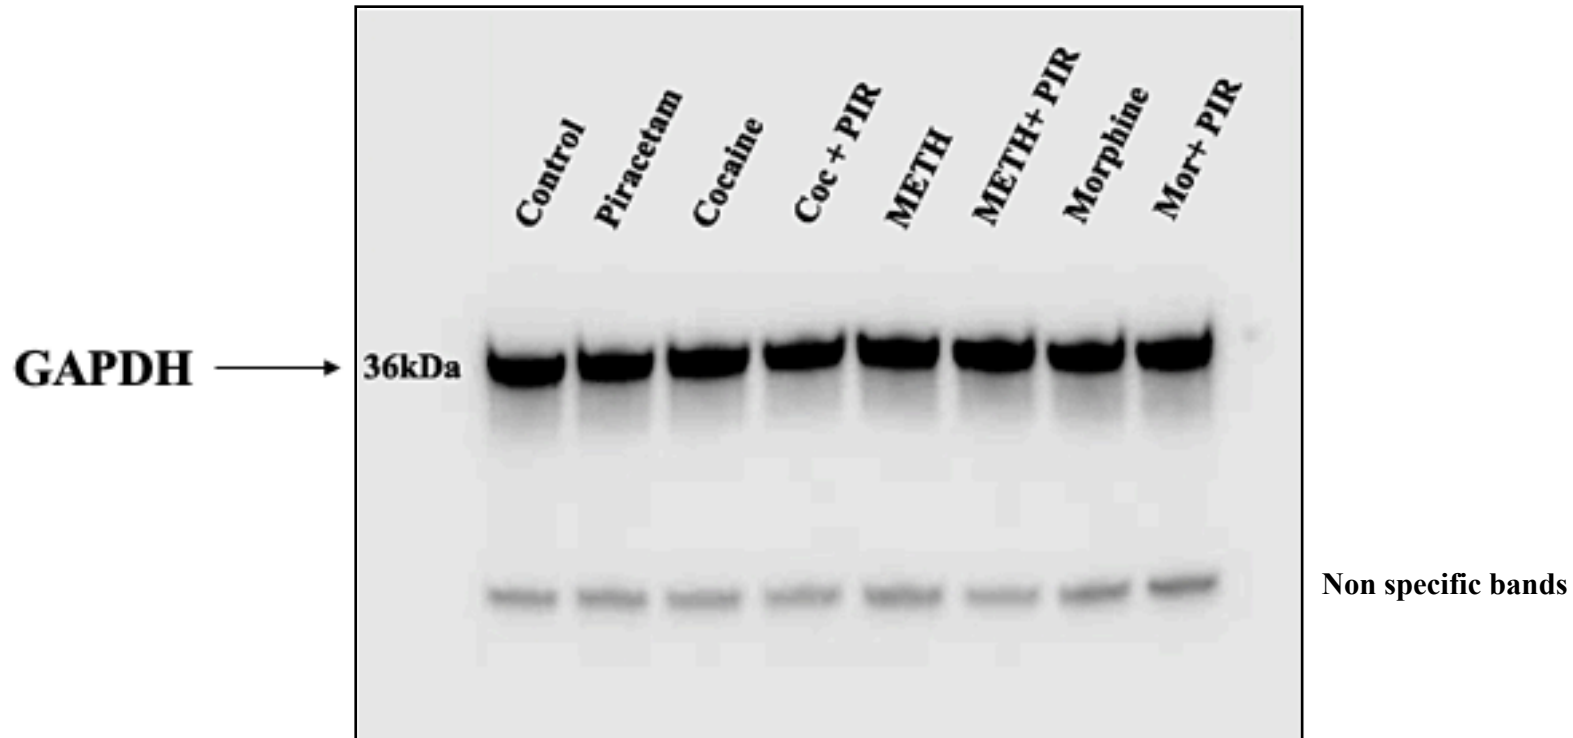

**Figure 6 B: GAPDH for SIRT-5 in human primary astrocytes.**  
The representative blot shows GAPDH for SIRT-5 in control, cocaine (1  $\mu$ M), METH (10  $\mu$ M) and morphine (5  $\mu$ M) alone or in combination with piracetam (10  $\mu$ M)

**Figure 6**

**E**

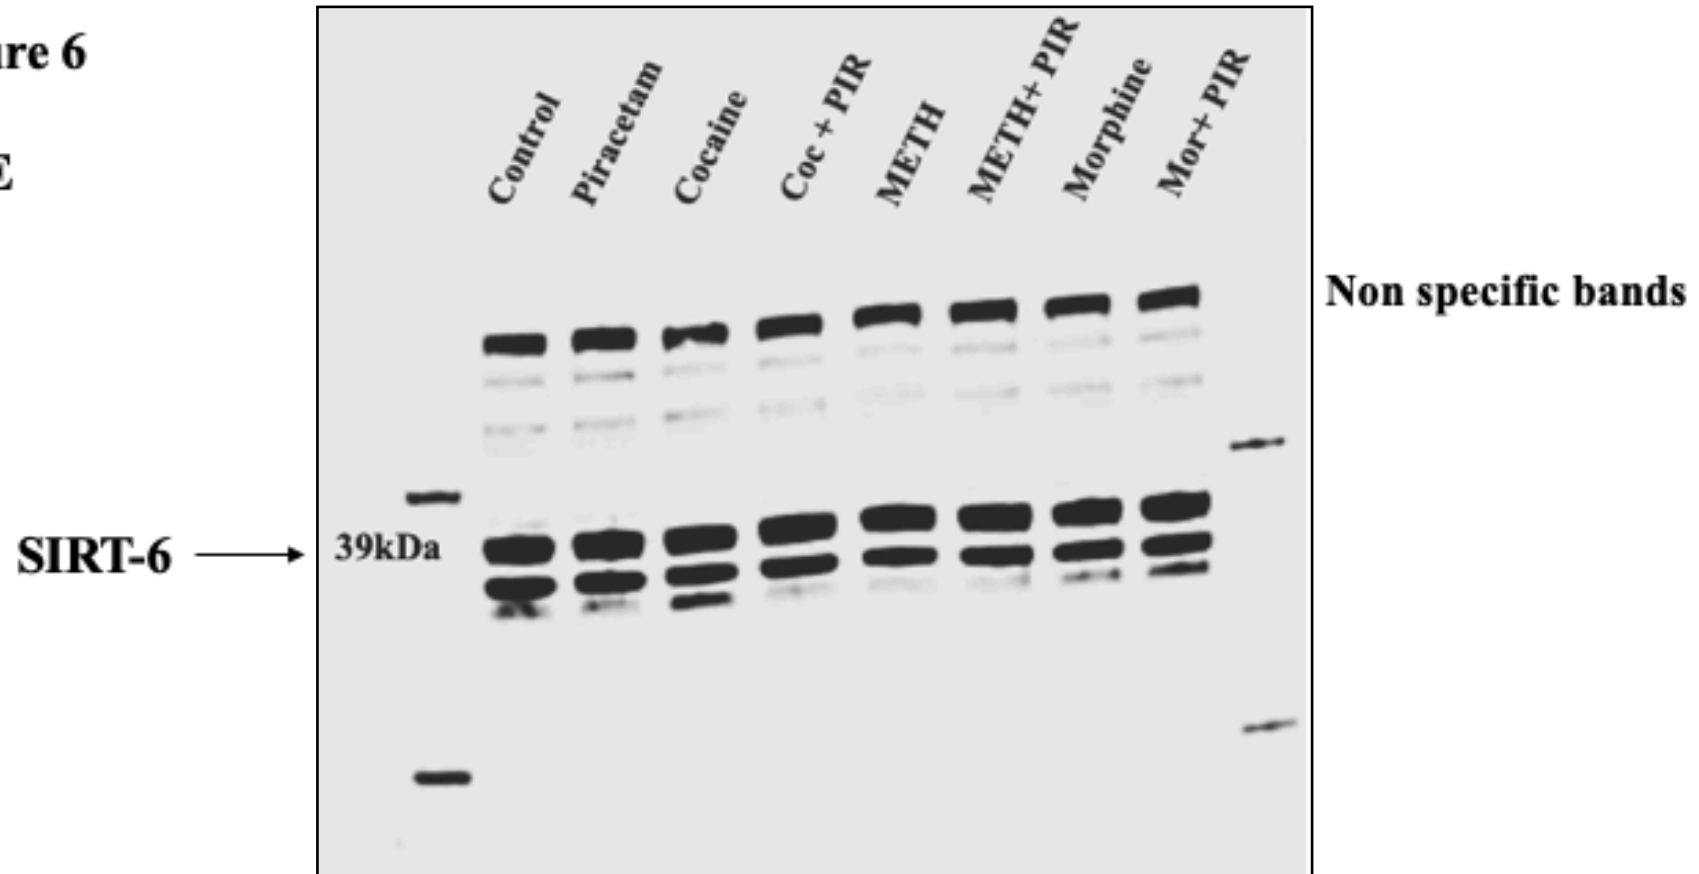

**Figure 6 E: Protective Effect of piracetam against psychostimulants and opioids on SIRT-6 in human primary astrocytes.**

**The representative blot shows SIRT-6 protein level in control, cocaine (1  $\mu$ M), METH (10  $\mu$ M) and morphine (5  $\mu$ M) alone or in combination with piracetam (10  $\mu$ M)**

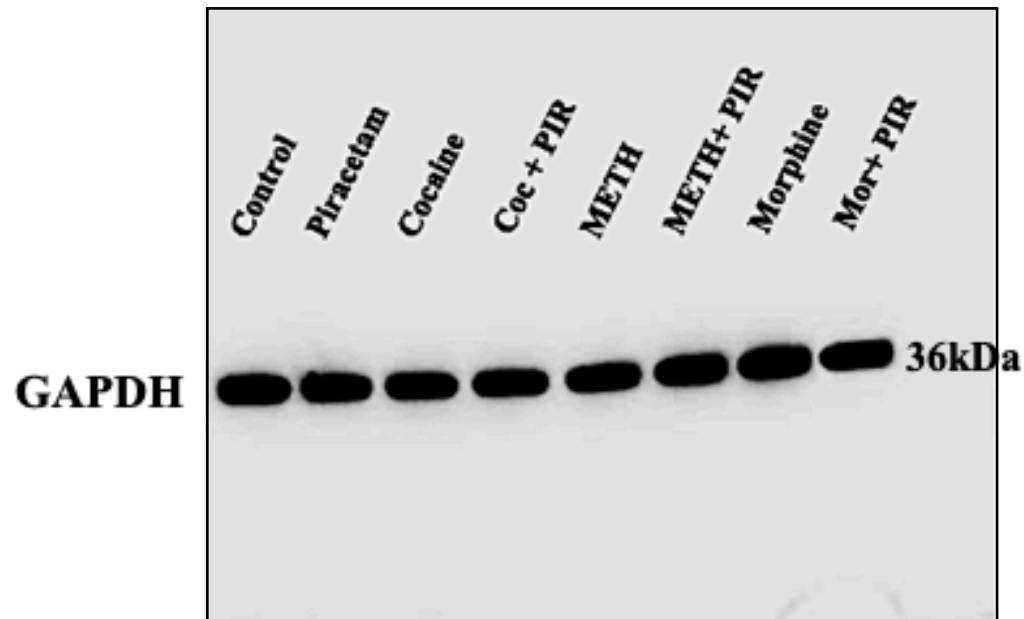

**Figure 6 E: GAPDH for SIRT-6 in human primary astrocytes.**  
The representative blot shows GAPDH for SIRT-6 in control, cocaine (1  $\mu$ M), METH (10  $\mu$ M) and morphine (5  $\mu$ M) alone or in combination with piracetam (10  $\mu$ M)

**Figure 6**

**F**

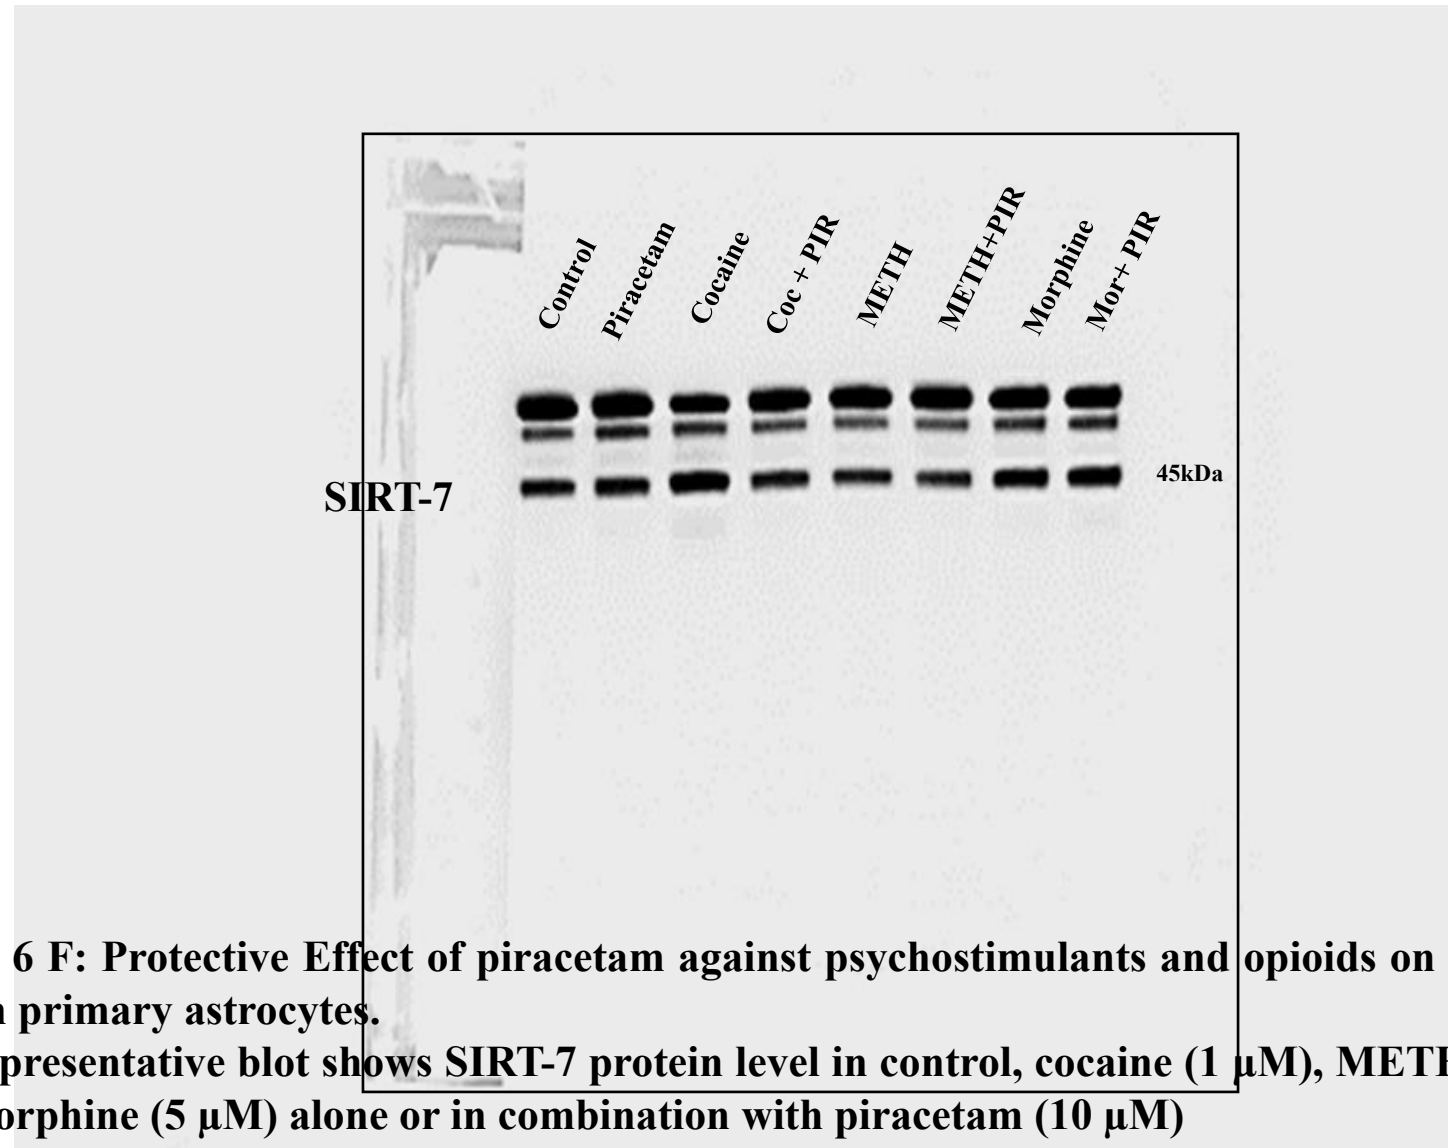

**Figure 6 F: Protective Effect of piracetam against psychostimulants and opioids on SIRT-7 in human primary astrocytes.**

**The representative blot shows SIRT-7 protein level in control, cocaine (1  $\mu$ M), METH (10  $\mu$ M) and morphine (5  $\mu$ M) alone or in combination with piracetam (10  $\mu$ M)**

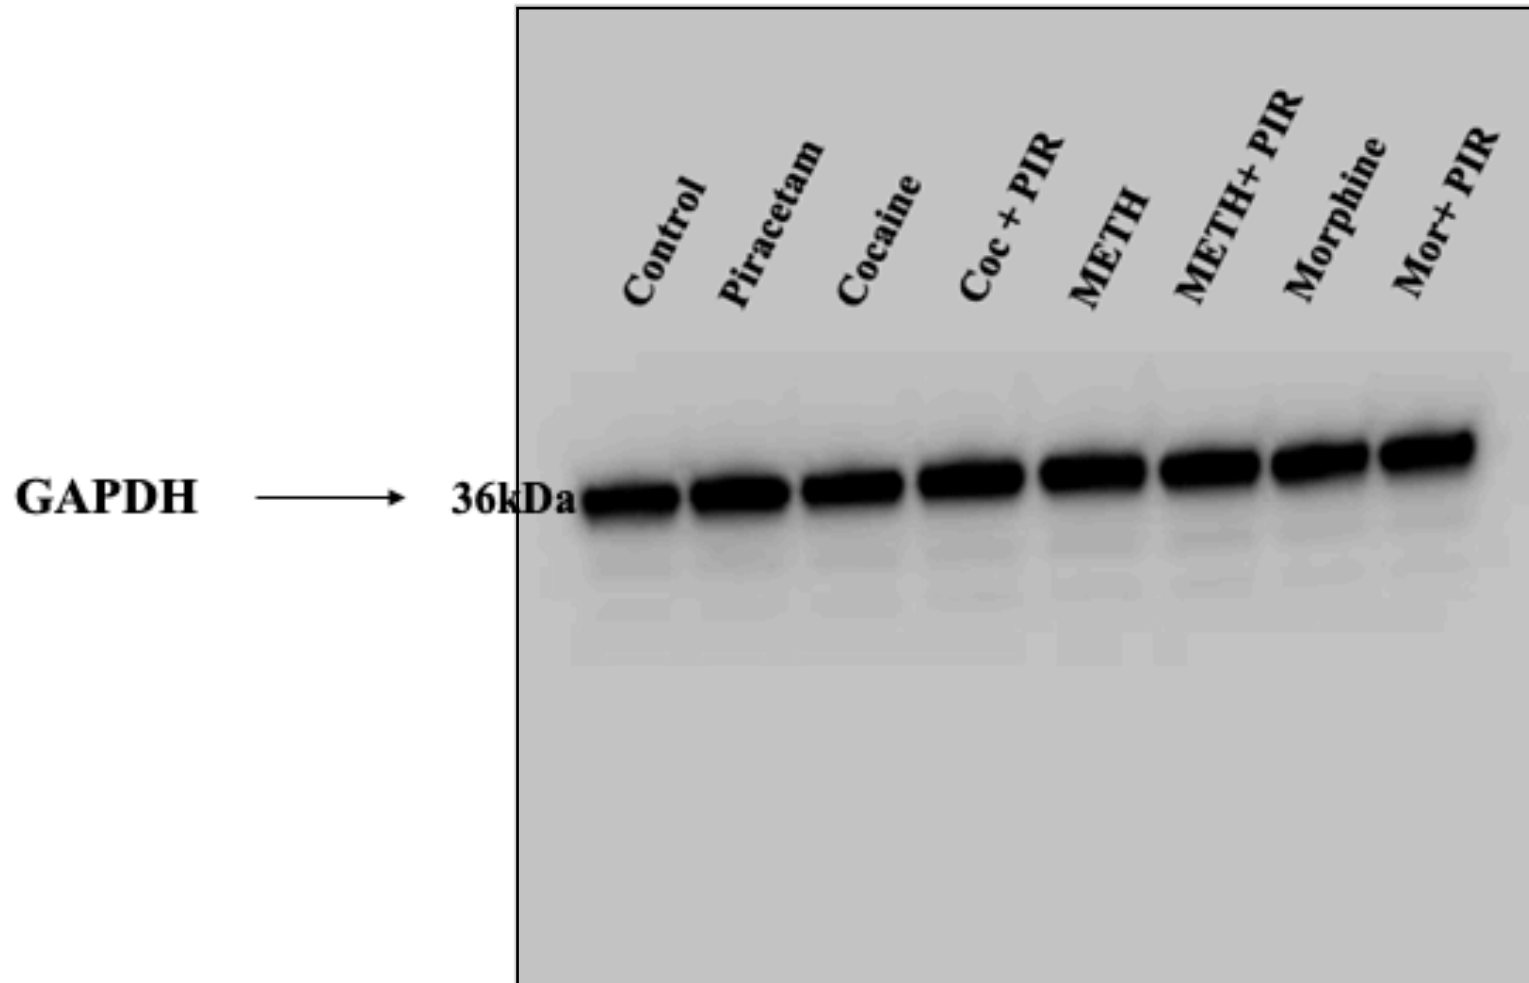

**Figure 6 F: GAPDH for SIRT-7 in human primary astrocytes.**

**The representative blot shows GAPDH for SIRT-7 in control, cocaine (1  $\mu$ M), METH (10  $\mu$ M) and morphine (5  $\mu$ M) alone or in combination with piracetam (10  $\mu$ M)**
