# Supplementary material for: Influence of psychostimulants and opioids on epigenetic modification of class III histone deacetylase (HDAC)-sirtuins in glial cells
Source: PubMed Central journal article supplement (PMC8556237; doi:10.1038/s41598-021-00836-z), 2021-10-29
Supplement: 41598_2021_836_MOESM6_ESM.pdf [file 41598_2021_836_MOESM6_ESM.pdf]

**Figure 7**

**A**

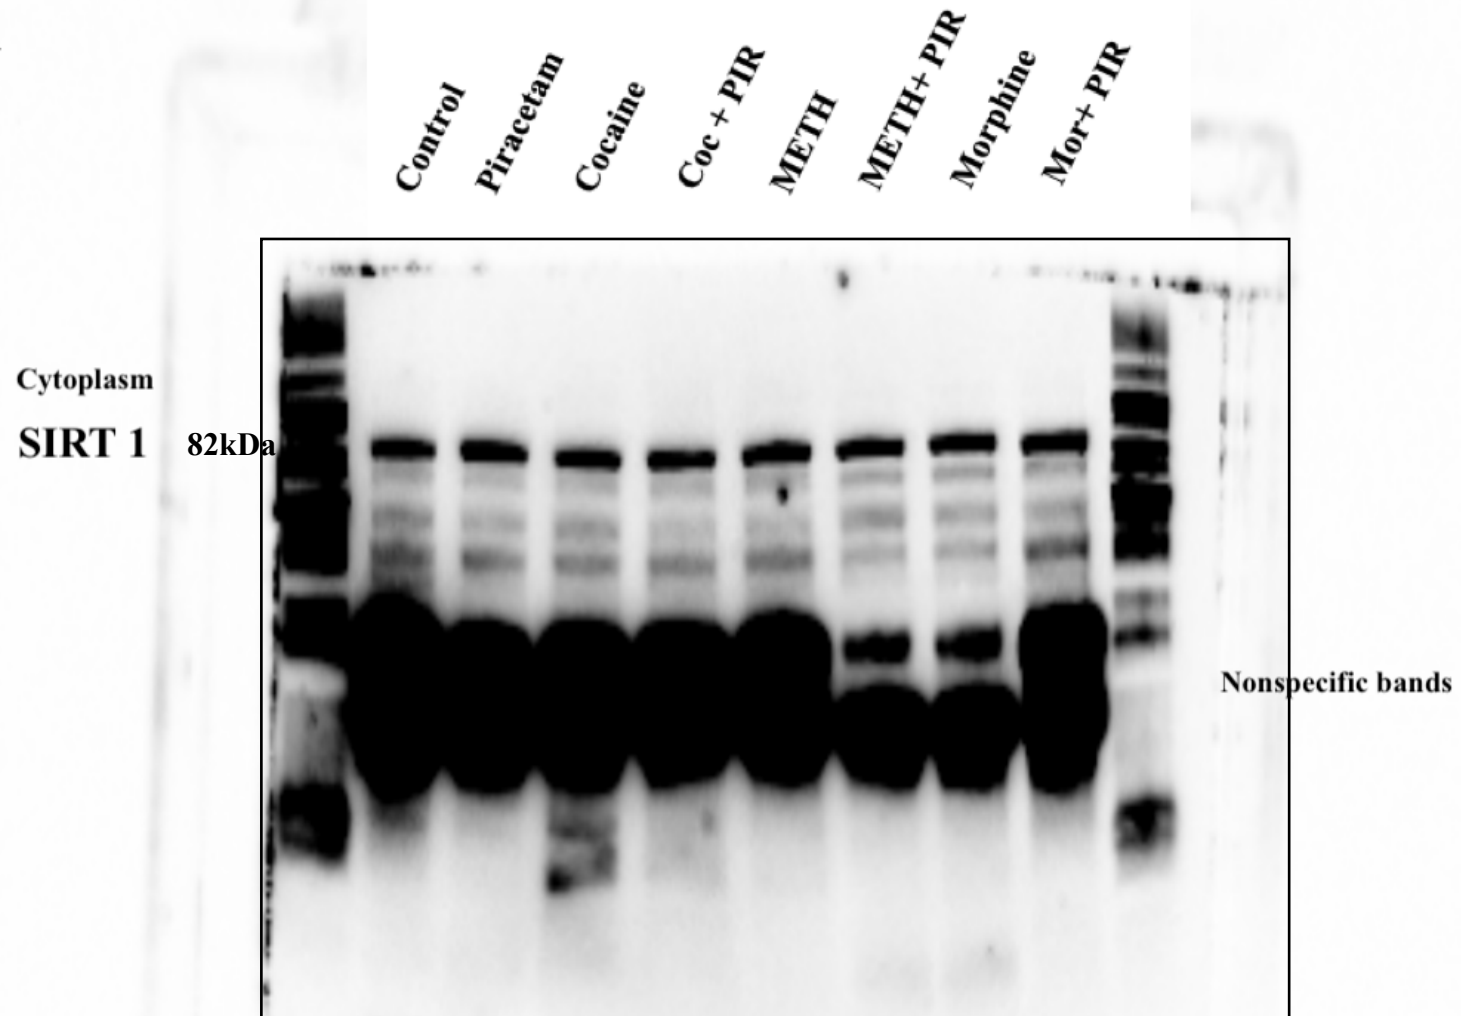

**Figure 7 A: Protective Effect of piracetam against psychostimulants and opioids on cytoplasmic SIRT-1 in human primary astrocytes.**

**The representative blot shows SIRT-1 protein level in control, cocaine (1  $\mu$ M), METH (10  $\mu$ M) and morphine (5  $\mu$ M) alone or in combination with piracetam (10  $\mu$ M)**

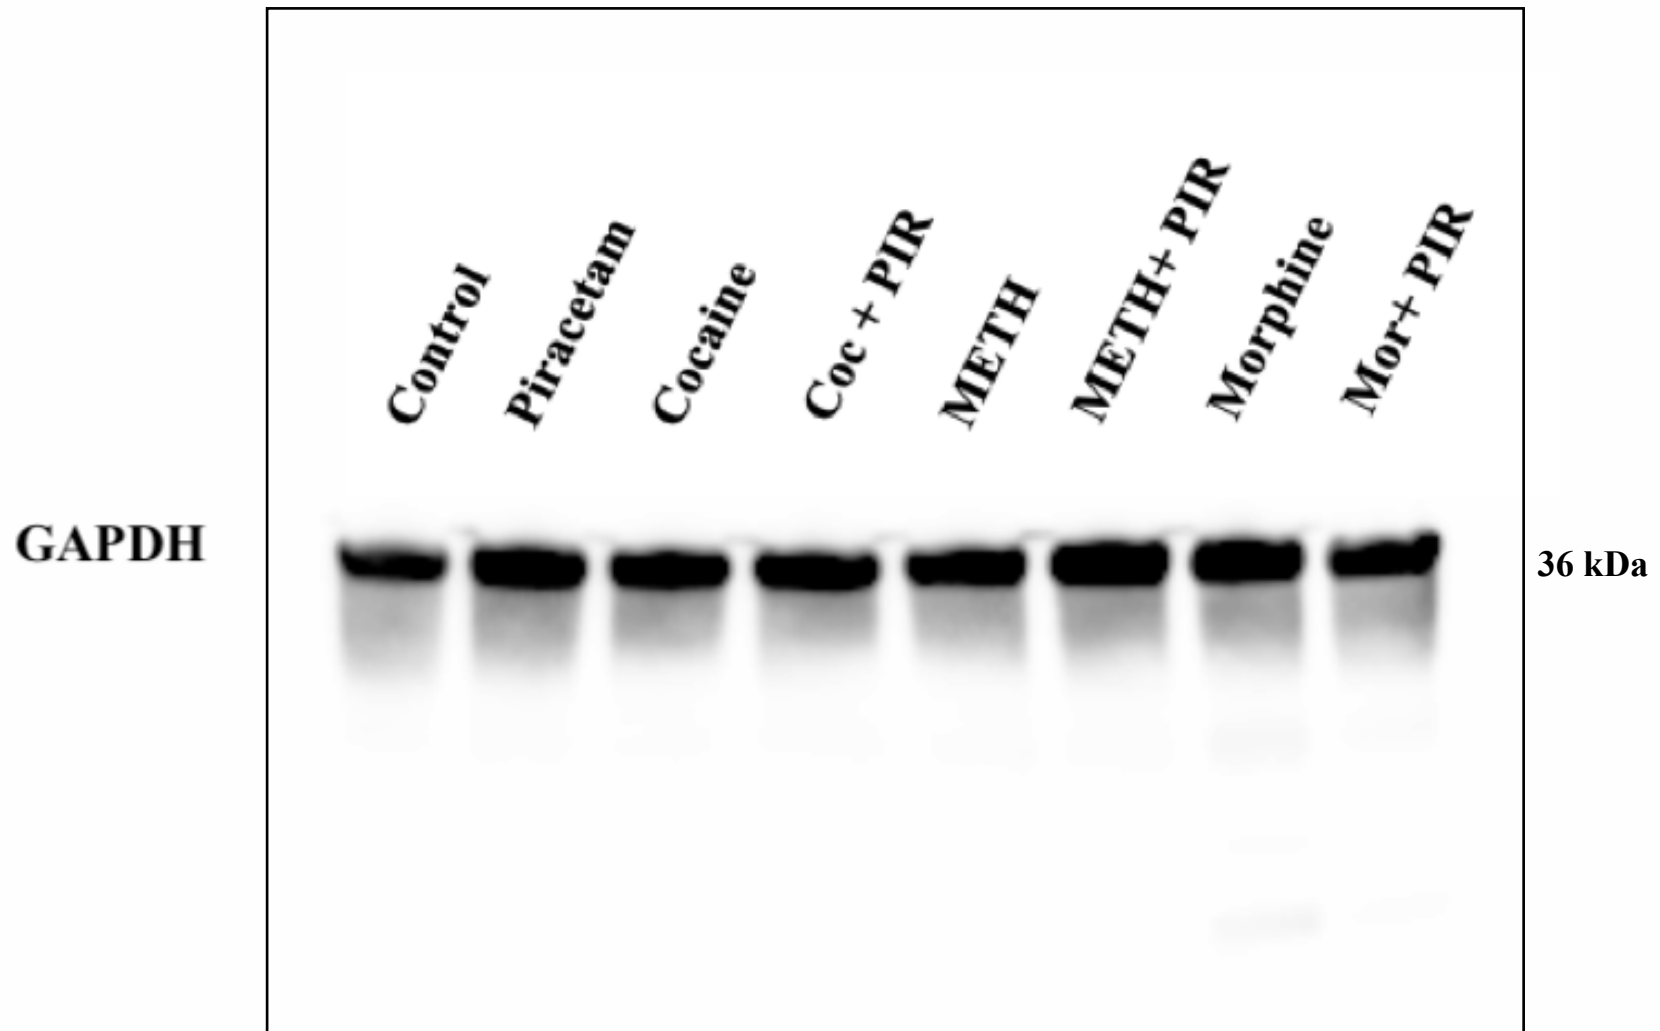

**Figure 7 A: GAPDH for cytoplasmic SIRT-1 in human primary astrocytes.**  
The representative blot shows GAPDH for SIRT-4 in control, cocaine (1  $\mu\text{M}$ ), METH (10  $\mu\text{M}$ ) and morphine (5  $\mu\text{M}$ ) alone or in combination with piracetam (10  $\mu\text{M}$ )

**Figure 7**

**C**

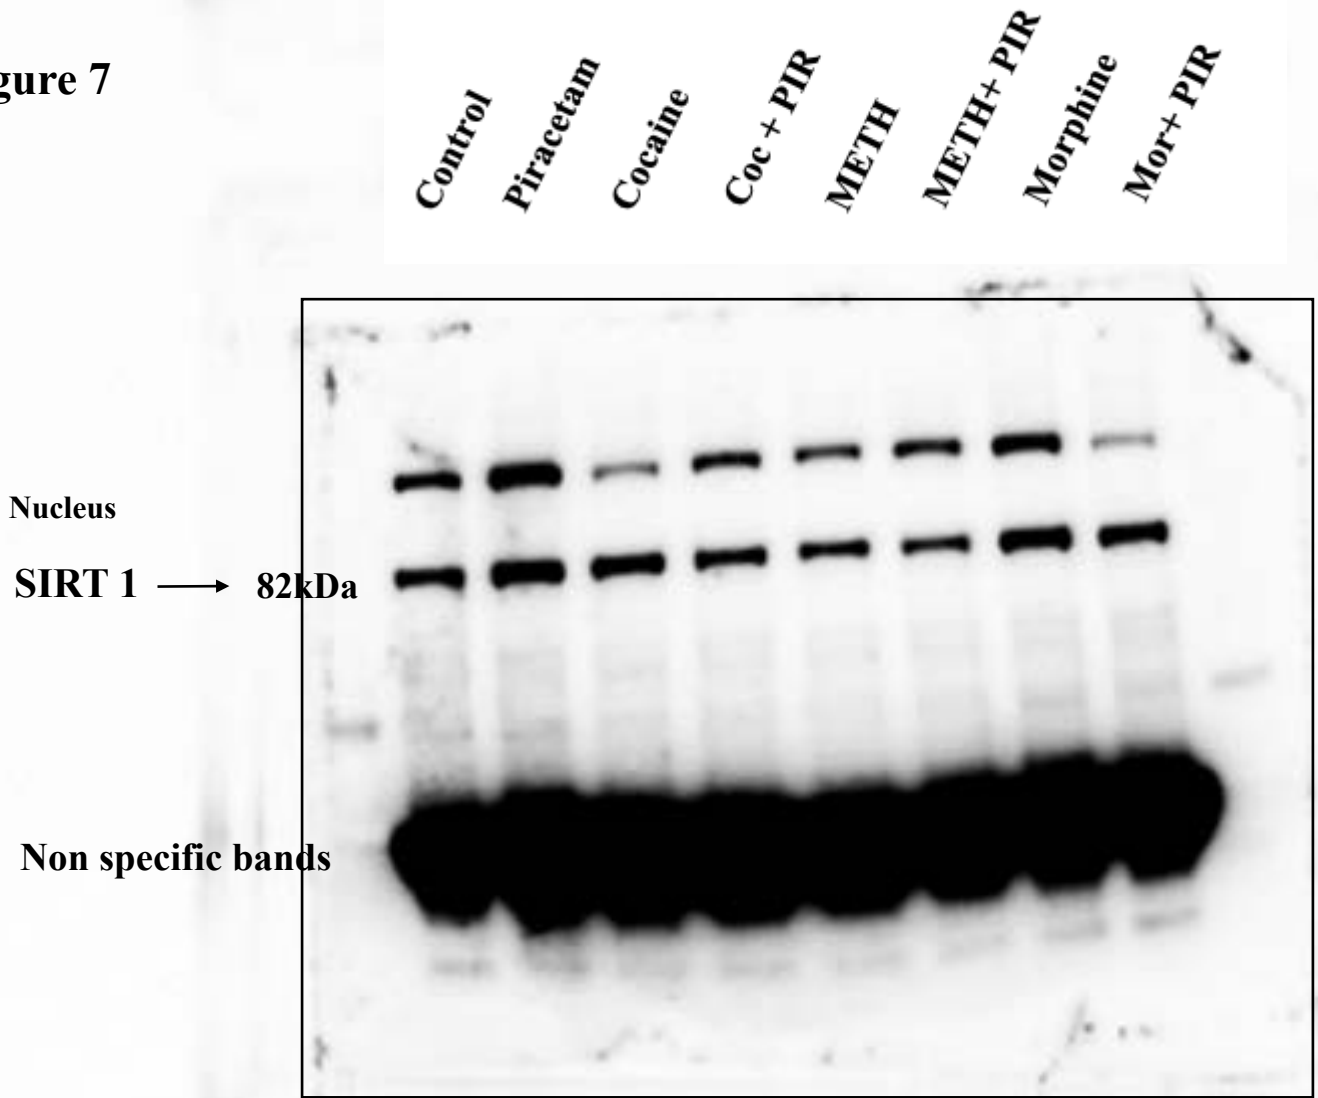

**Figure 7 C: Protective Effect of piracetam against psychostimulants and opioids on nuclear SIRT-1 in human primary astrocytes.**  
The representative blot shows SIRT-1 protein level in control, cocaine (1  $\mu$ M), METH (10  $\mu$ M) and morphine (5  $\mu$ M) alone or in combination with piracetam (10  $\mu$ M)

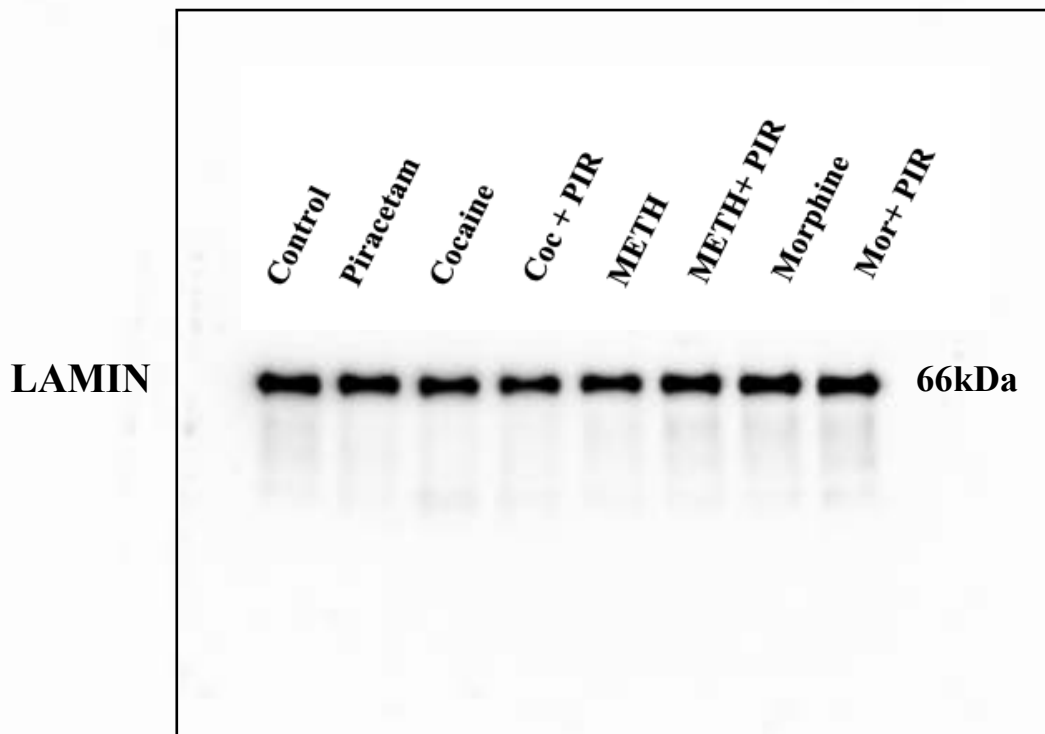

**Figure 7 C: LAMIN for nuclear SIRT-1 in human primary astrocytes. The representative blot shows LAMIN for SIRT-1 in control, cocaine (1  $\mu$ M), METH (10  $\mu$ M) and morphine (5  $\mu$ M) alone or in combination with piracetam (10  $\mu$ M)**

**Figure 7**

**E**

**Cytoplasm**

**SIRT 7** → **45kDa**

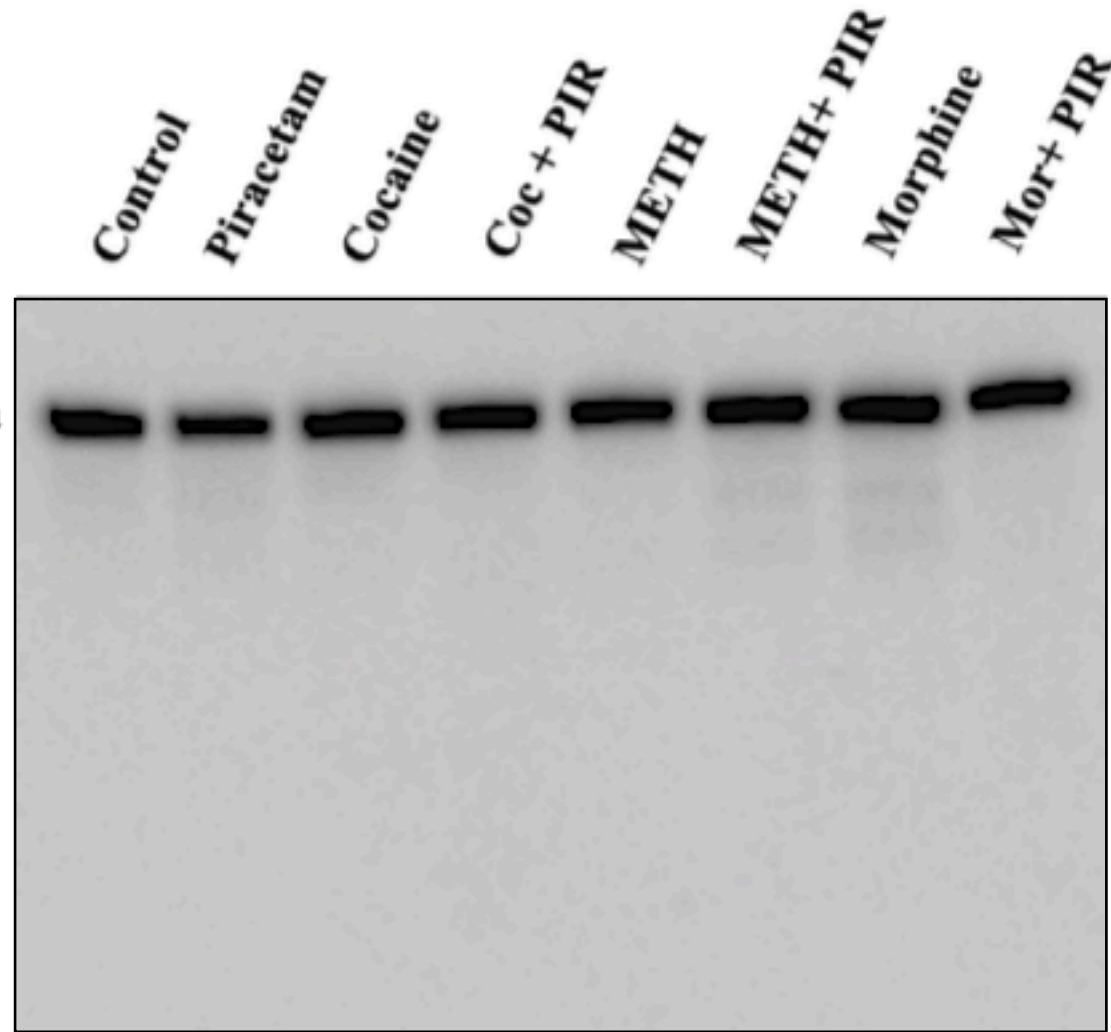

**Figure 7 E: Protective Effect of piracetam against psychostimulants and opioids on cytoplasmic SIRT-7 in human primary astrocytes.**

**The representative blot shows SIRT-7 protein level in control, cocaine (1  $\mu$ M), METH (10  $\mu$ M) and morphine (5  $\mu$ M) alone or in combination with piracetam (10  $\mu$ M)**

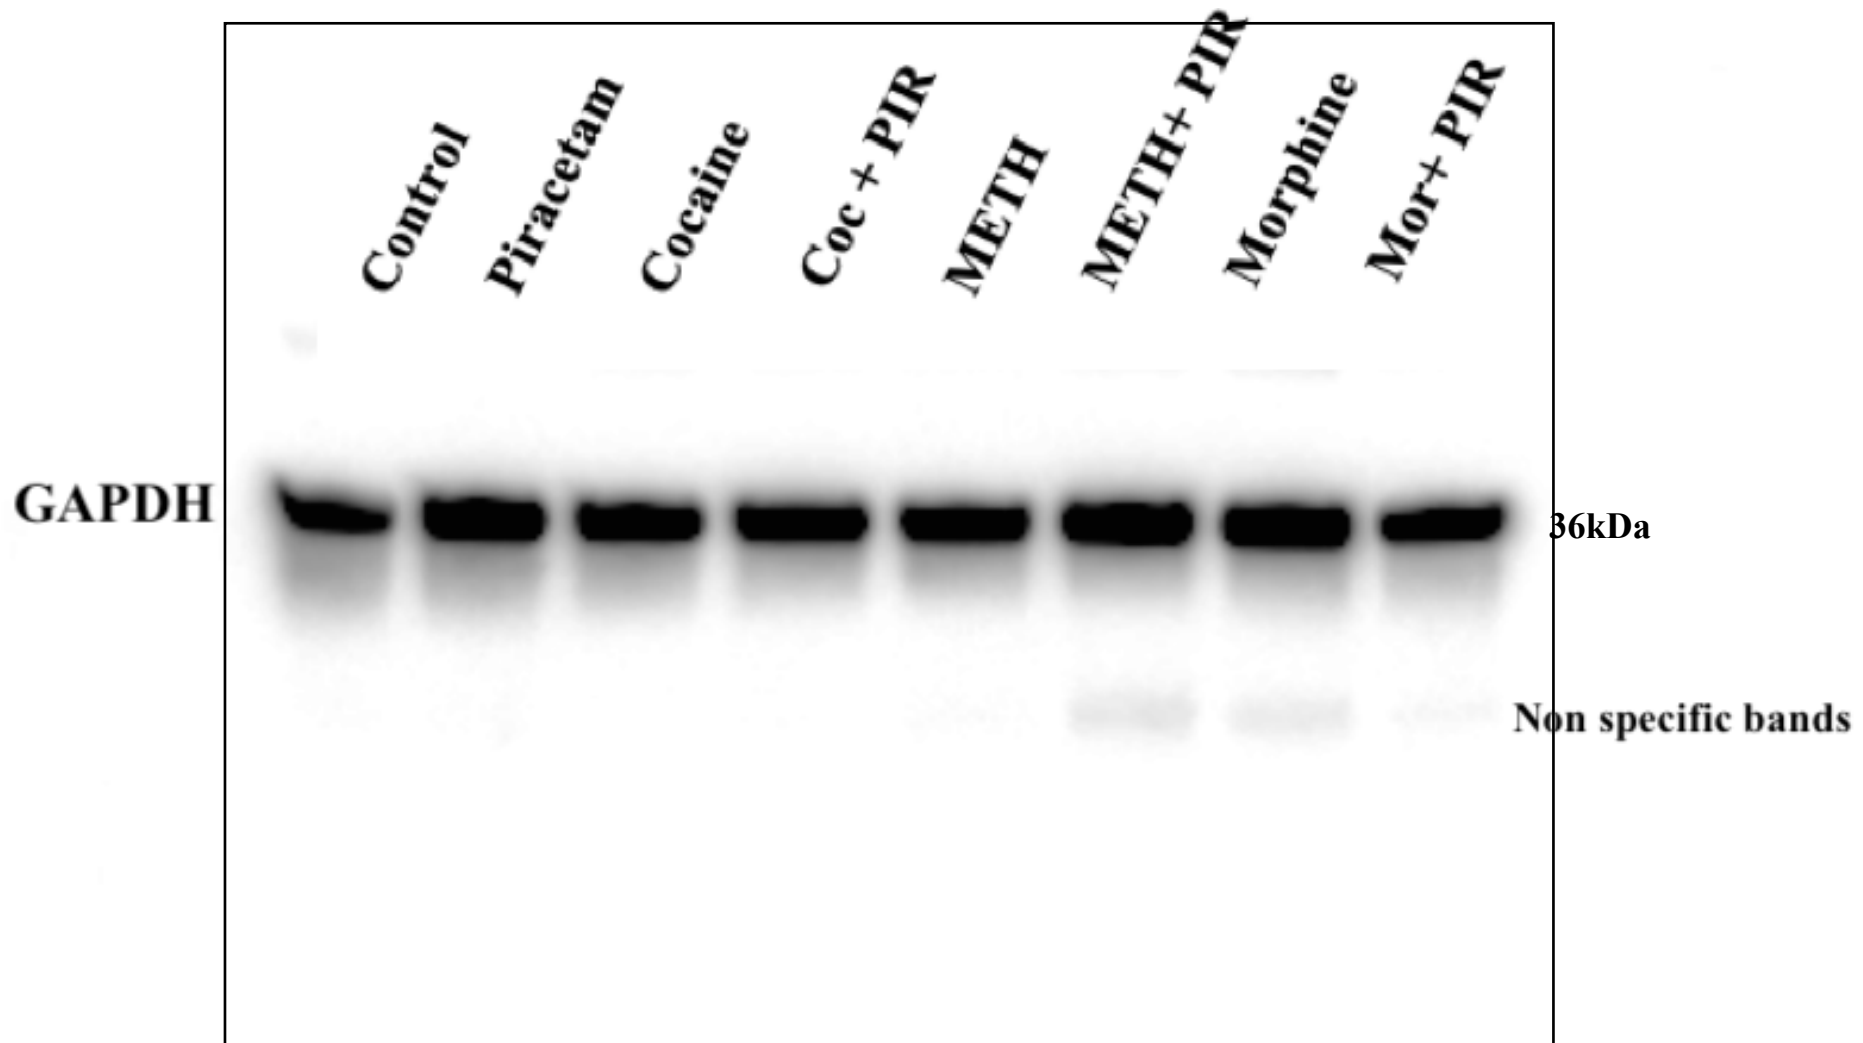

**Figure 7 E: GAPDH for cytoplasmic SIRT-7 in human primary astrocytes.**  
The representative blot shows GAPDH for SIRT-7 in control, cocaine (1  $\mu$ M), METH (10  $\mu$ M) and morphine (5  $\mu$ M) alone or in combination with piracetam (10  $\mu$ M)

**Figure 7**

**G**

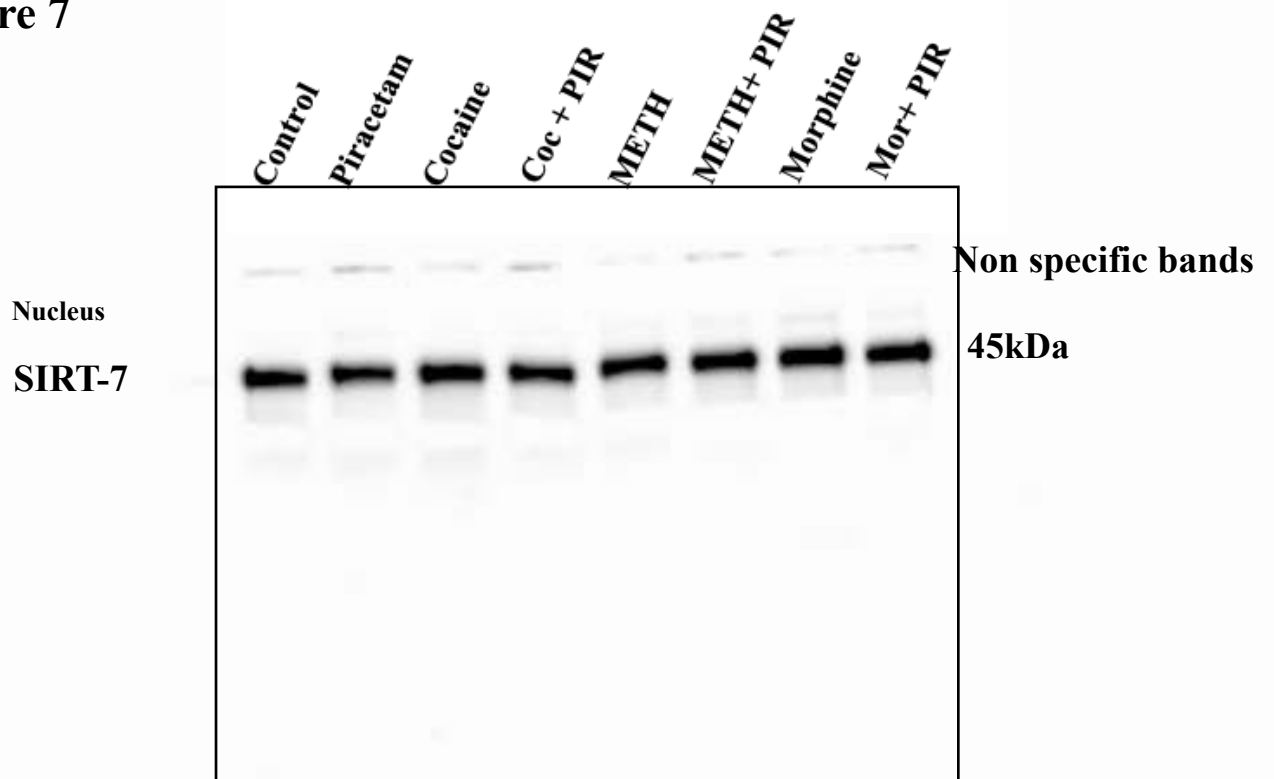

**Figure 7 G: Protective Effect of piracetam against psychostimulants and opioids on nuclear SIRT-7 in human primary astrocytes.**

The representative blot shows SIRT-7 protein level in control, cocaine (1  $\mu$ M), METH (10  $\mu$ M) and morphine (5  $\mu$ M) alone or in combination with piracetam (10  $\mu$ M)

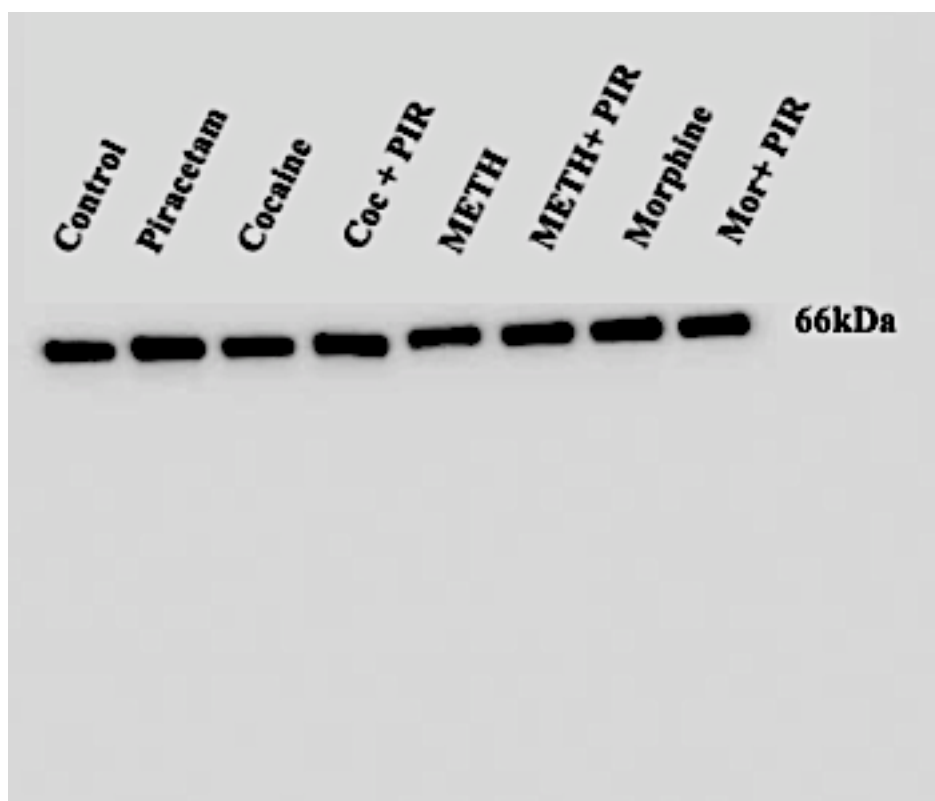

**Figure 7 G: LAMIN for nuclear SIRT-7 in human primary astrocytes.**  
The representative blot shows LAMIN for SIRT-7 in control, cocaine (1  $\mu$ M), METH (10  $\mu$ M) and morphine (5  $\mu$ M) alone or in combination with piracetam (10  $\mu$ M)
